# Supplementary material for: Synthesis and bonding analysis of pentagonal bipyramidal rhenium carboxamide oxo complexes
Source: Royal Society of Chemistry journal article supplement (doi:10.1039/d3dt02617e), 2023-01-01
Supplement: d3dt02617e1.pdf [file d3dt02617e1.pdf]

**Supporting Information**  
**for**

**Synthesis and Bonding Analysis of Pentagonal Bipyramidal Rhenium Carboxamide Oxo  
Complexes**

*Noah D. McMillion,<sup>1</sup> Quinton J. Bruch,<sup>1</sup> Chun-Hsing Chen,<sup>1</sup> Faraj Hasanayn<sup>2,\*</sup>, and Alexander  
J. M. Miller<sup>1,\*</sup>*

<sup>1</sup> Department of Chemistry, University of North Carolina at Chapel Hill, Chapel Hill, North  
Carolina 27599-3290, United States

<sup>2</sup> Department of Chemistry, American University of Beirut, Beirut 1107 2020, Lebanon

\* Corresponding author information: F.H. ([fh19@aub.edu.lb](mailto:fh19@aub.edu.lb)); A.J.M.M. ([ajmm@email.unc.edu](mailto:ajmm@email.unc.edu))

## Table of Contents

|                                                                   |            |
|-------------------------------------------------------------------|------------|
| <b>I. NMR Spectra</b>                                             | <b>S3</b>  |
| <b>II. IR Spectra</b>                                             | <b>S10</b> |
| <b>III. Crystallographic Details</b>                              | <b>S12</b> |
| <b>IV. Cambridge Crystallographic Database Centre Comparisons</b> | <b>S38</b> |
| <b>V. Computational Details</b>                                   | <b>S39</b> |
| <b>VI. References</b>                                             | <b>S40</b> |

## I. NMR Spectra

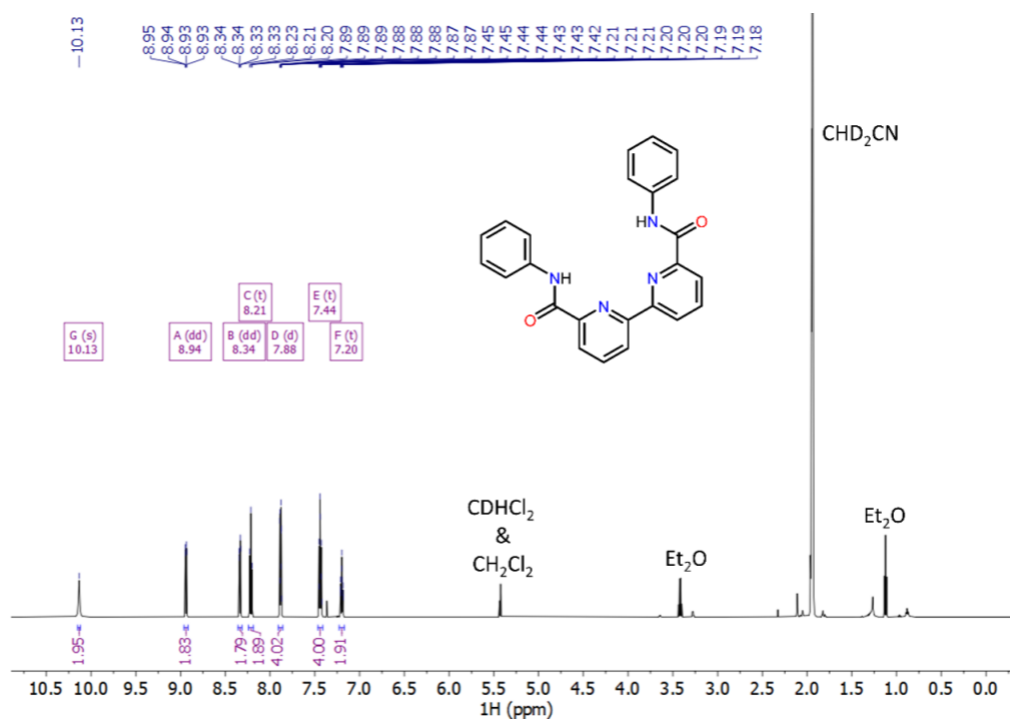

**Figure S1.**  $^1\text{H}$  NMR spectrum (600 MHz) of  $\text{H}_2\text{Phbpy-da}$  in  $\text{CD}_3\text{CN}$  and 8%  $\text{CD}_2\text{Cl}_2$  by volume.

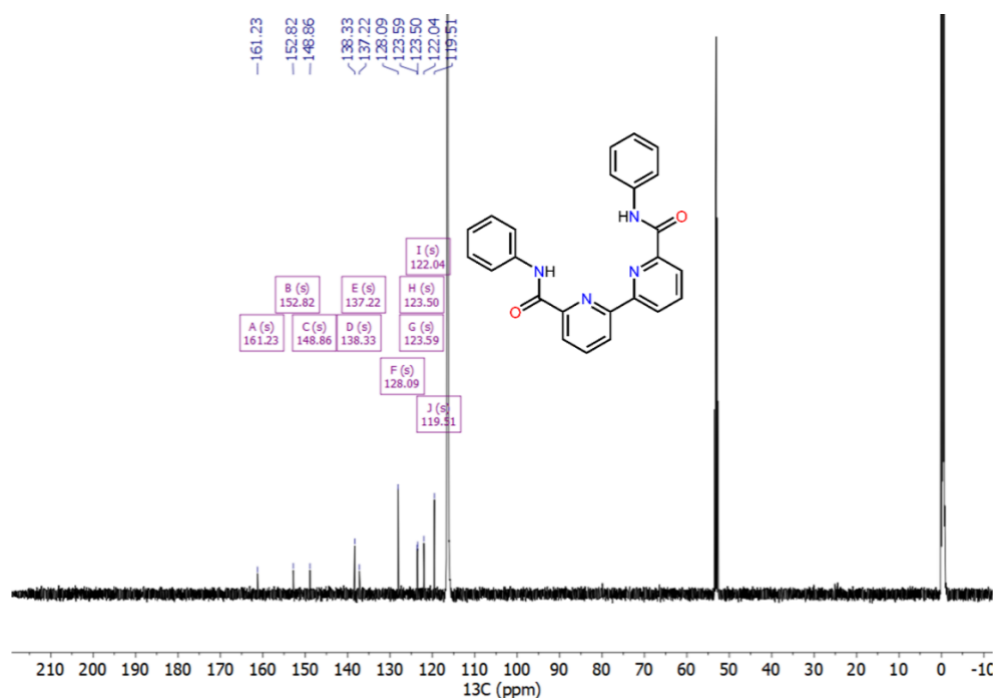

**Figure S2.**  $^{13}\text{C}\{^1\text{H}\}$  NMR spectrum (151 MHz) of  $\text{H}_2\text{Phbpy-da}$  in  $\text{CD}_3\text{CN}$  and 8%  $\text{CD}_2\text{Cl}_2$ .

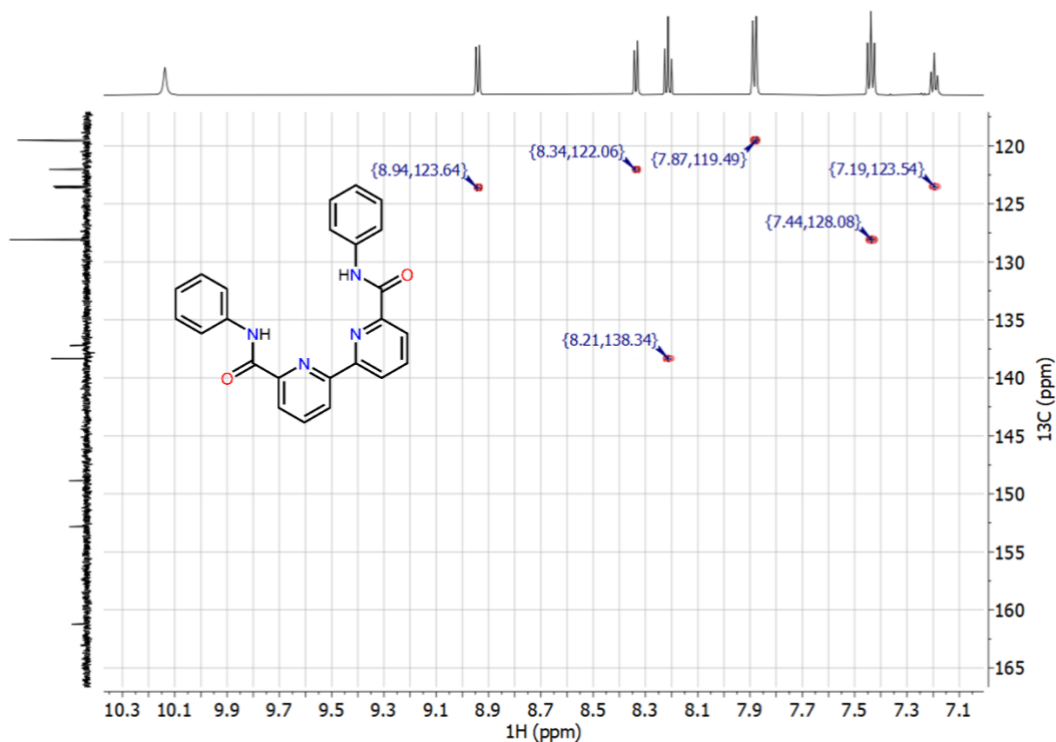

**Figure S3.**  $^1\text{H}$ - $^{13}\text{C}$  HSQC NMR spectrum (aromatic region) of  $\text{H}_2^{\text{Ph}}$ bpy-da in  $\text{CD}_3\text{CN}$  and 8%  $\text{CD}_2\text{Cl}_2$ .

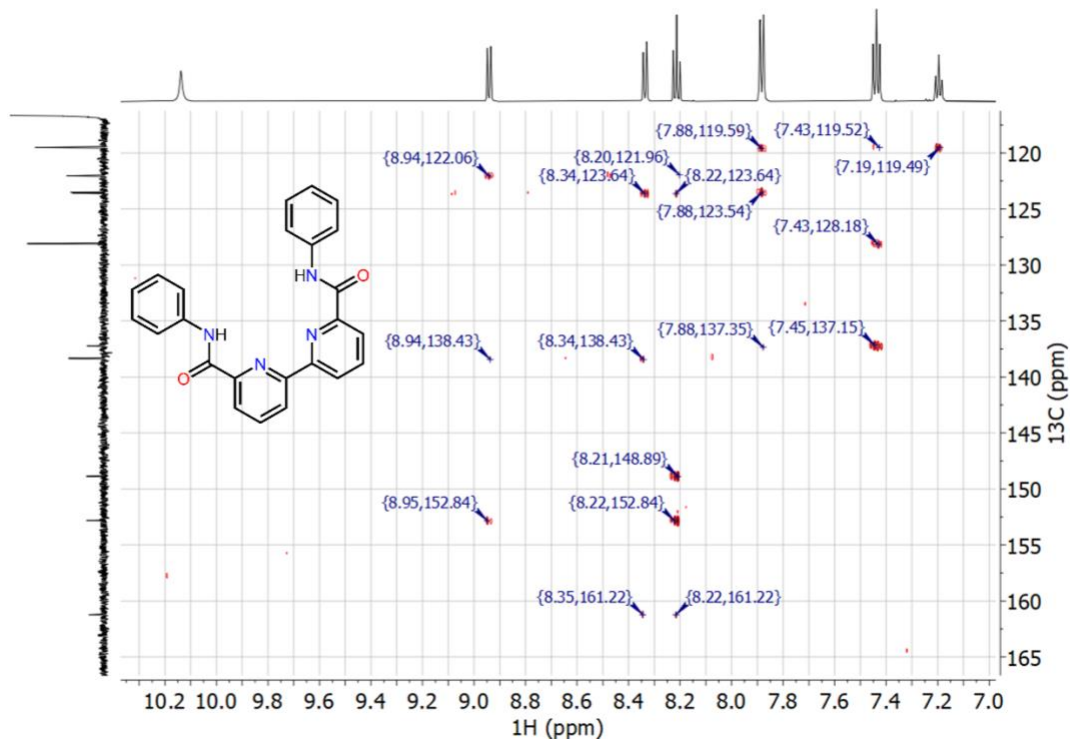

**Figure S4.**  $^1\text{H}$ - $^{13}\text{C}$  HMBC NMR spectrum (aromatic region) of  $\text{H}_2^{\text{Ph}}$ bpy-da in  $\text{CD}_3\text{CN}$  and 8%  $\text{CD}_2\text{Cl}_2$ .

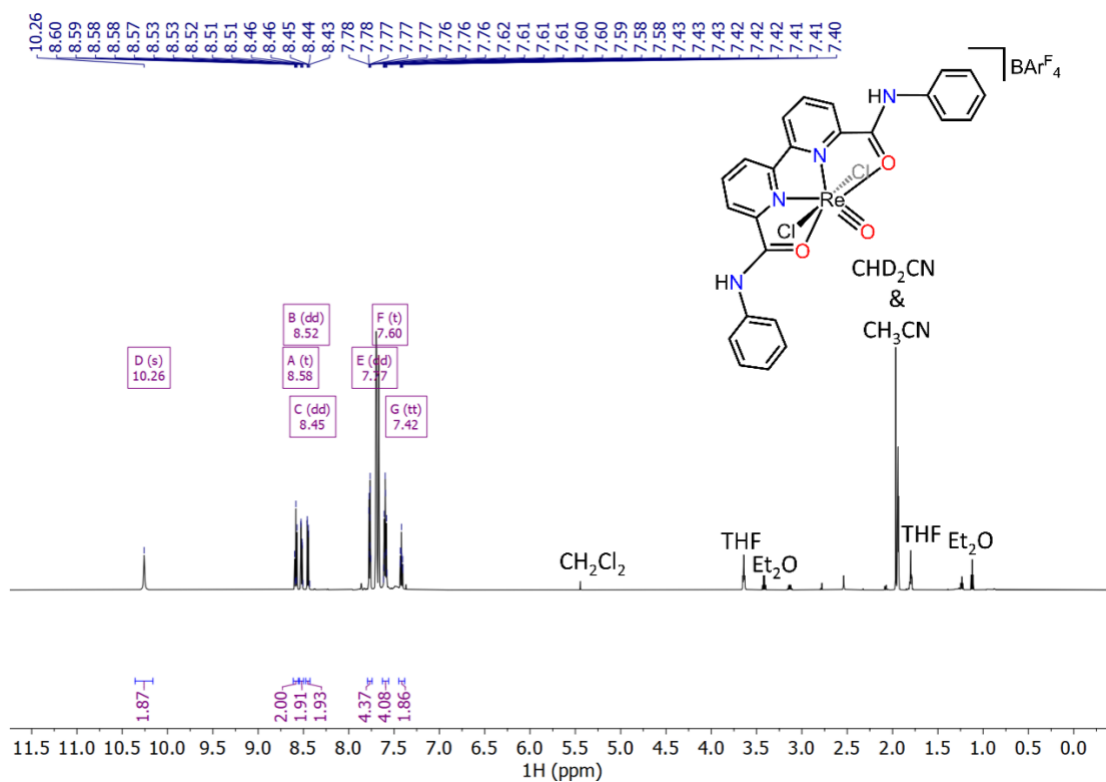

**Figure S5.**  $^1\text{H}$  NMR spectrum (600 MHz) of  $[1][\text{BARF}_4]$  in  $\text{CD}_3\text{CN}$ .

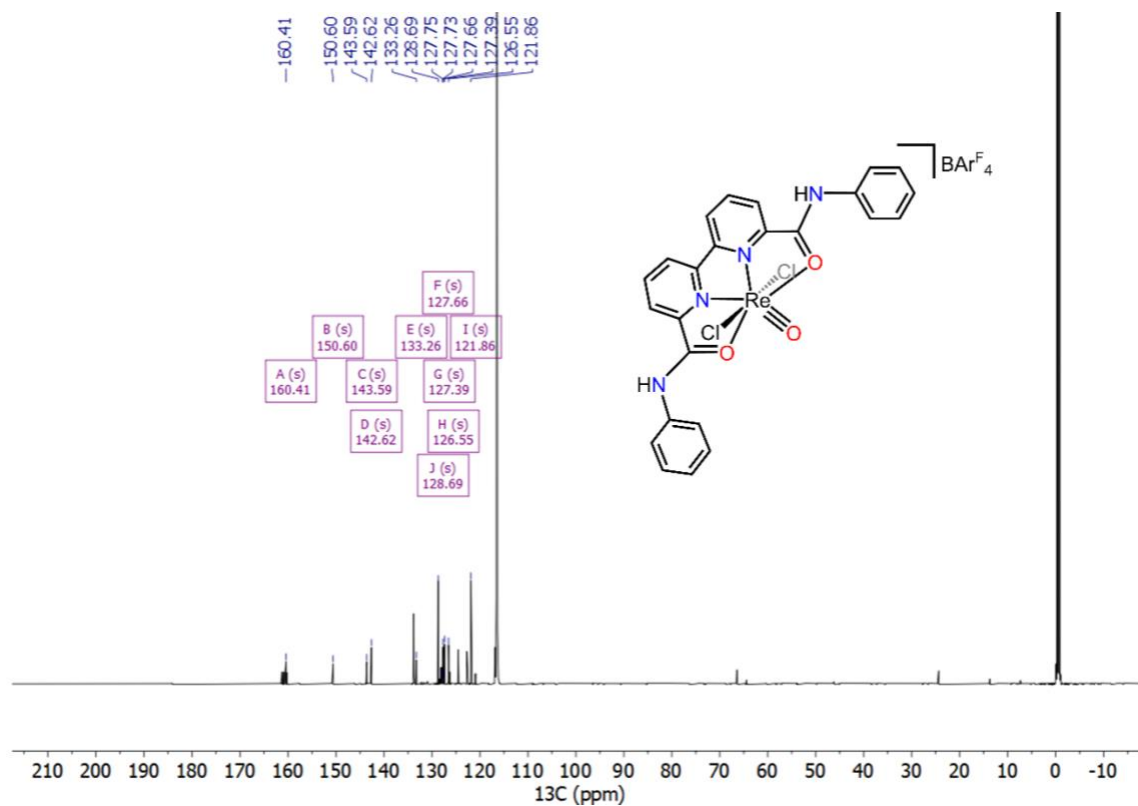

**Figure S6.**  $^{13}\text{C}\{^1\text{H}\}$  NMR spectrum (151 MHz) of  $[1][\text{BARF}_4]$  in  $\text{CD}_3\text{CN}$ .

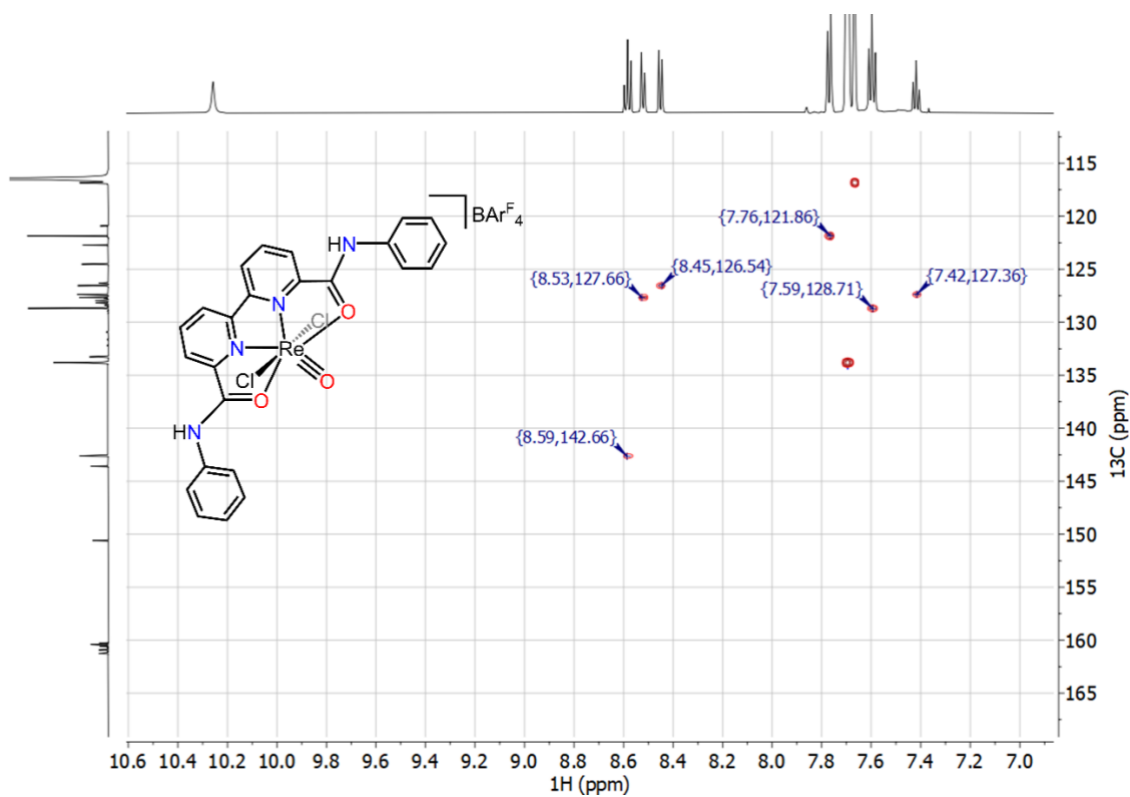

**Figure S7.**  $^1\text{H}$ - $^{13}\text{C}$  HSQC NMR spectrum (aromatic region) of  $[1][\text{BARF}_4]$  in  $\text{CD}_3\text{CN}$ .

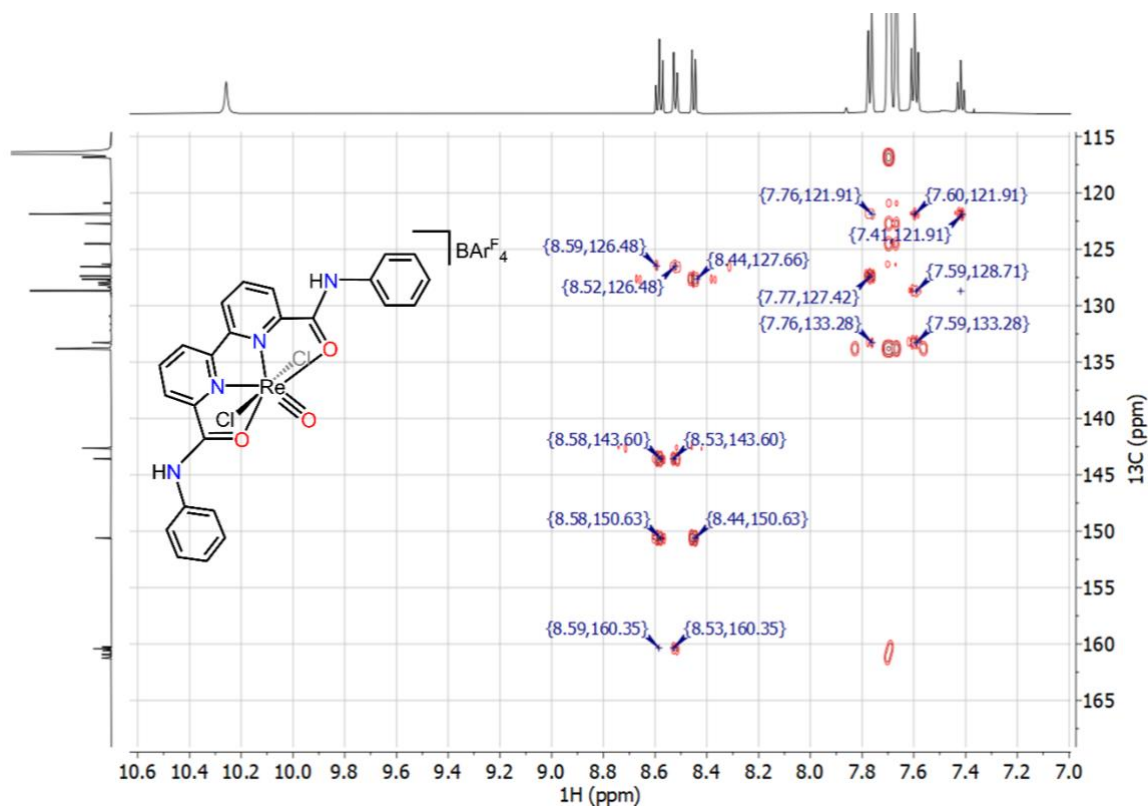

**Figure S8.**  $^1\text{H}$ - $^{13}\text{C}$  HMBC NMR spectrum (aromatic region) of  $[1][\text{BARF}_4]$  in  $\text{CD}_3\text{CN}$ .

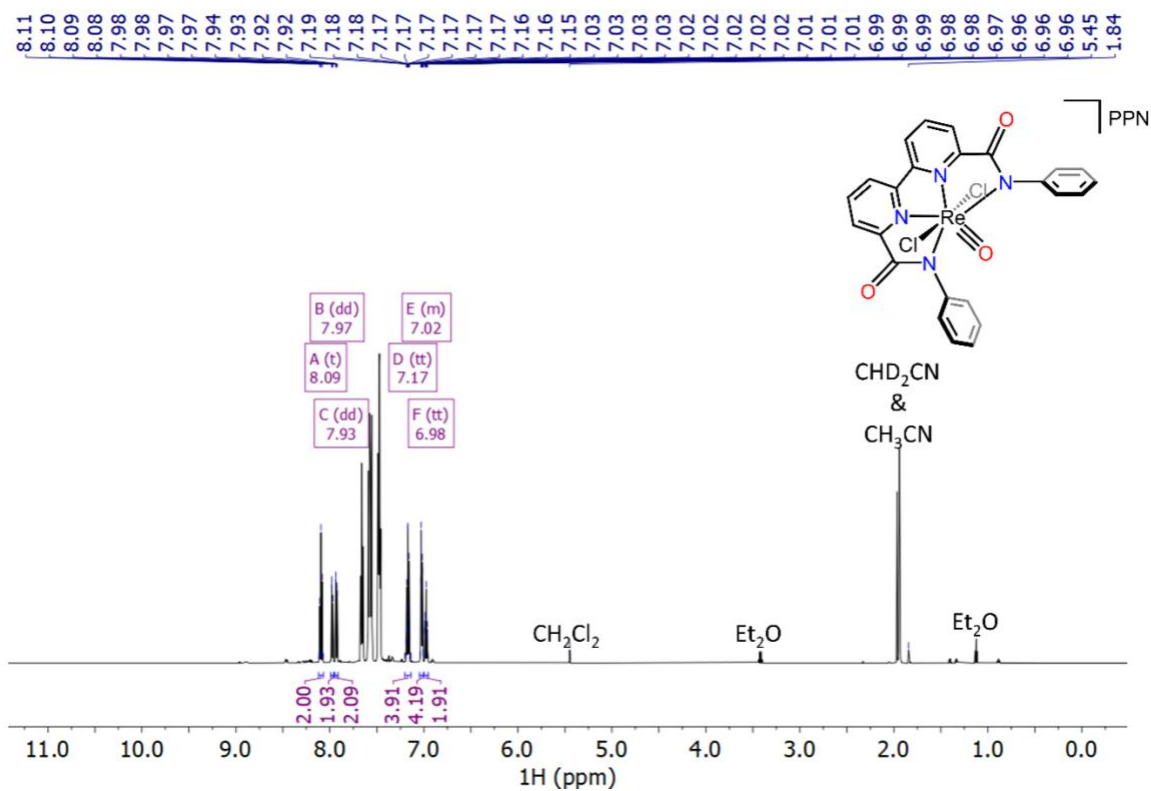

**Figure S9.**  $^1\text{H}$  NMR spectrum (600 MHz) of [PPN][2] in  $\text{CD}_3\text{CN}$ .

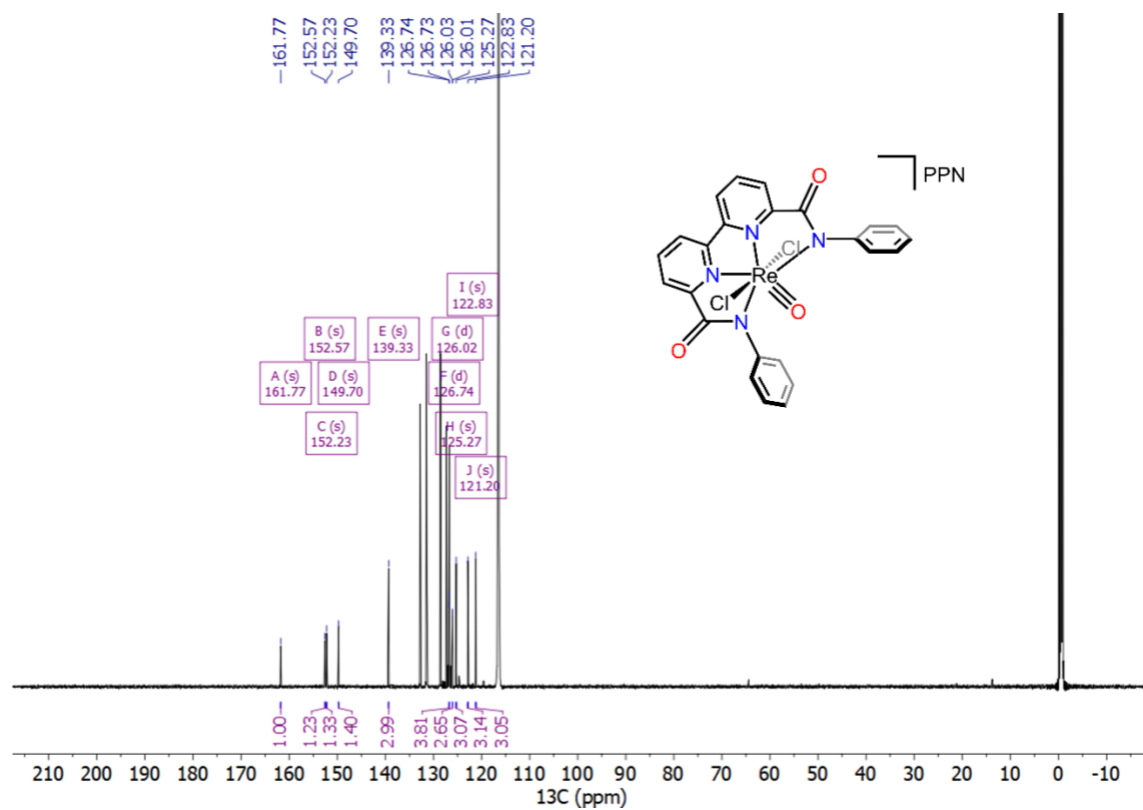

**Figure S10.**  $^{13}\text{C}\{^1\text{H}\}$  NMR spectrum (151 MHz) of [PPN][2] in  $\text{CD}_3\text{CN}$ .

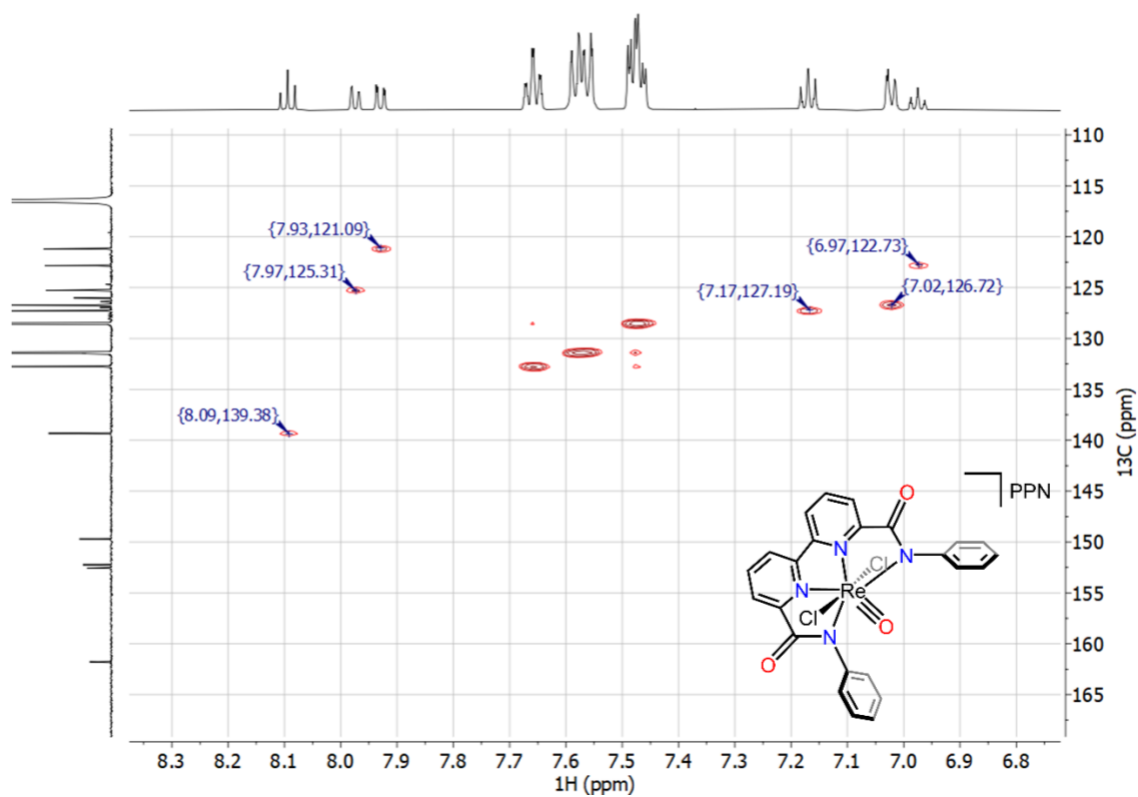

**Figure S11.**  $^1\text{H}$ - $^{13}\text{C}$  HSQC NMR spectrum (aromatic region) of [PPN][2] in  $\text{CD}_3\text{CN}$ .

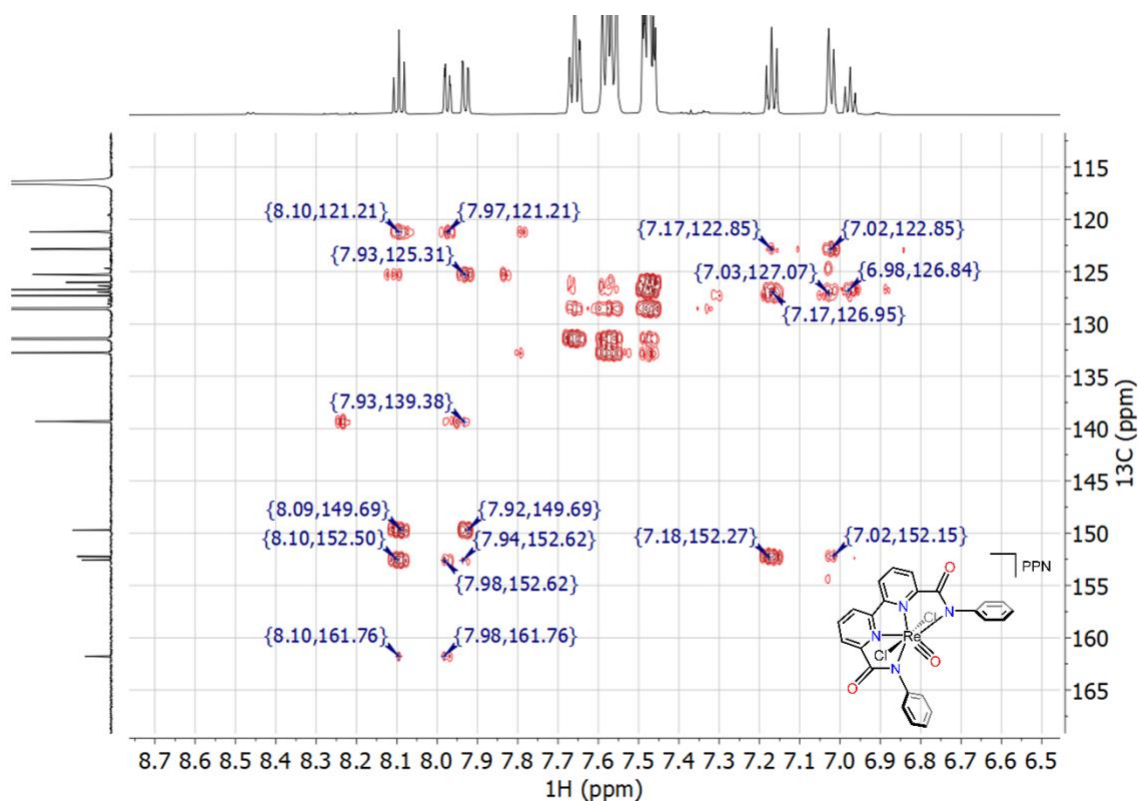

**Figure S12.**  $^1\text{H}$ - $^{13}\text{C}$  HMBC NMR spectrum (aromatic region) of [PPN][2] in  $\text{CD}_3\text{CN}$ .



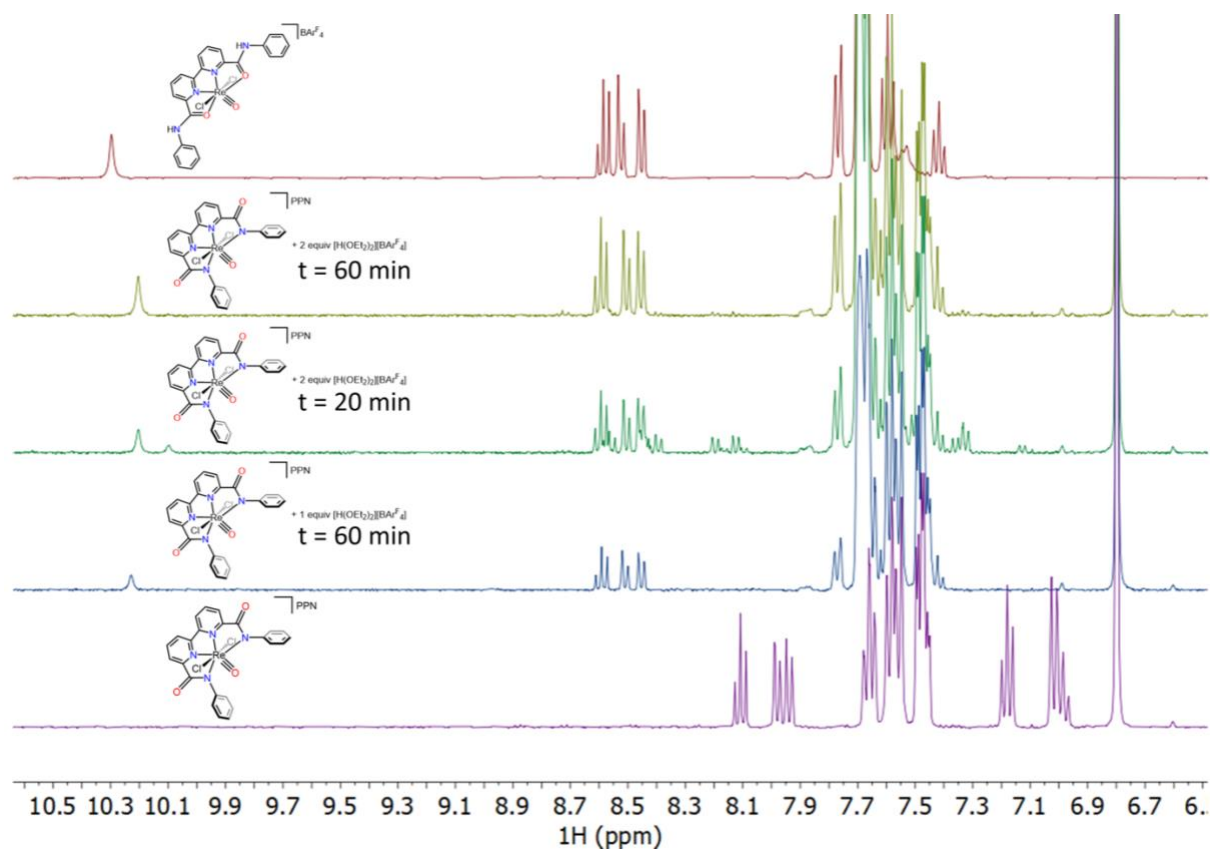

**Figure S13.** NMR spectroscopic analysis of the protonation of [PPN][**2**]. Purple (bottom):  $^1\text{H}$  NMR spectrum (400 MHz) of [PPN][**2**]. Blue:  $^1\text{H}$  NMR spectrum (400 MHz) of [PPN][**2**] and 1 equiv  $[\text{H}(\text{OEt}_2)_2][\text{BAr}^{\text{F}_4}]$  after reacting for 1 hour. Dark green:  $^1\text{H}$  NMR spectrum (400 MHz) of [PPN][**2**] and 2 equivalents of  $[\text{H}(\text{OEt}_2)_2][\text{BAr}^{\text{F}_4}]$  after reacting for 20 min. Light green:  $^1\text{H}$  NMR spectrum (400 MHz) of [PPN][**2**] and 2 equivalents of  $[\text{H}(\text{OEt}_2)_2][\text{BAr}^{\text{F}_4}]$  after reacting for 1 hour. Red (top):  $^1\text{H}$  NMR spectrum (600 MHz) of [**1**][ $\text{BAr}^{\text{F}_4}$ ]. Mesitylene (18 mM) was added as an internal standard.

## II. Infrared Spectra

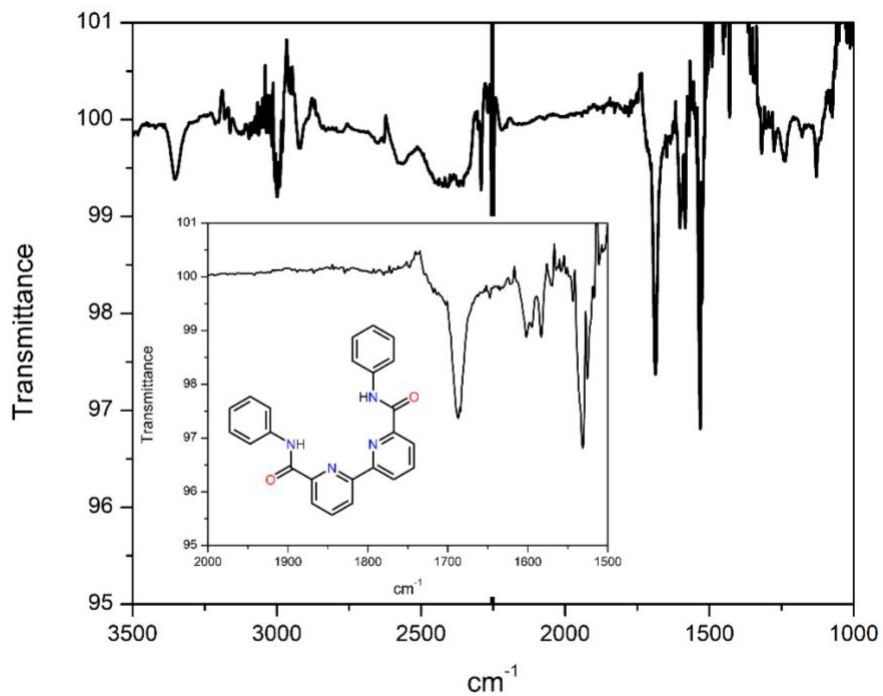

**Figure S14.** Solution-phase FTIR spectrum of  $H_2^{Ph}bpy-da$  in MeCN and 8%  $CH_2Cl_2$ . Inset: Carbonylic region.

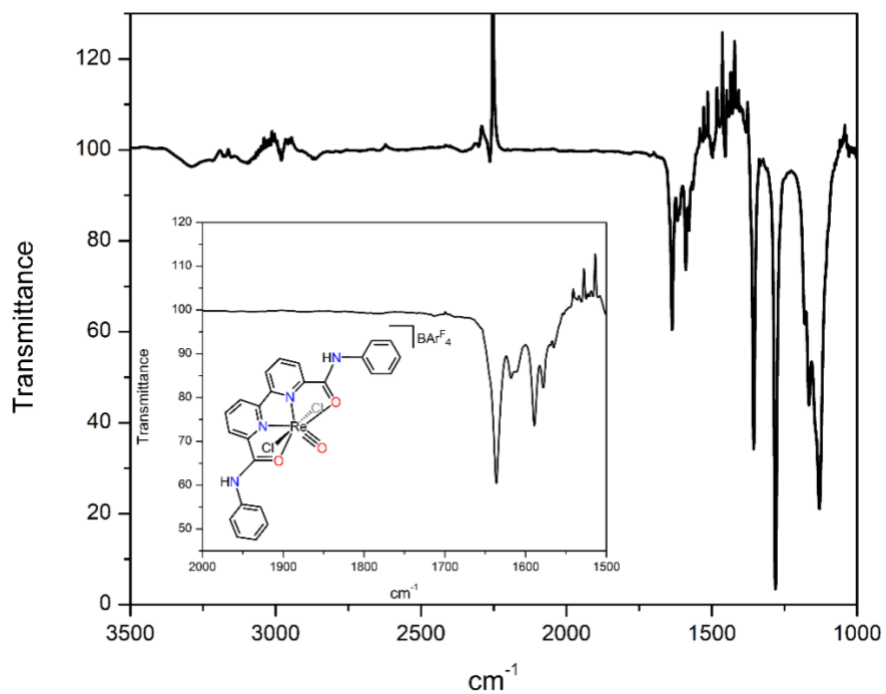

**Figure S15.** Solution-phase FTIR spectrum of  $[1][BARF_4]$  in MeCN. Inset: Carbonylic region.

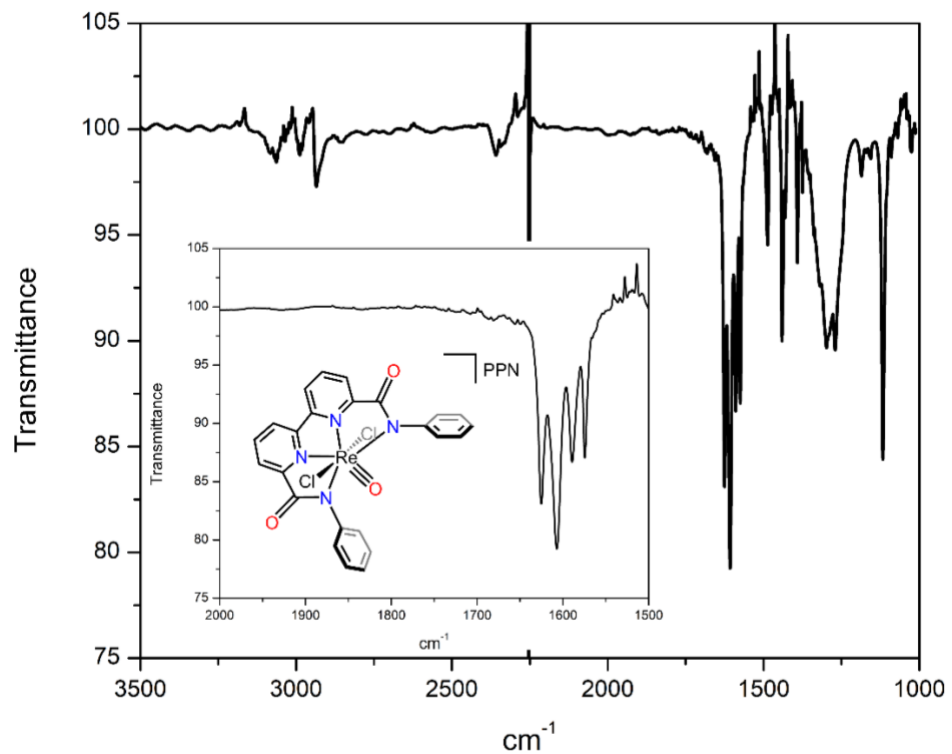

**Figure S16.** Solution-phase FTIR spectrum of [PPN][2] in MeCN. Inset: Carbonylic region.

### III. Crystallographic Details

#### $\text{H}_2^{\text{Ph}}\text{bpy-d}\text{a} - 22021$

**Crystallographic Details.** The crystal sample was grown at room temperature in air via slow vapor diffusion of diethyl ether into a saturated acetonitrile solution. From this sample, a colorless crystal of approximate dimensions 0.05 mm x 0.1 mm x 0.1 mm was placed onto the tip of a MiTeGen loop before mounting the crystal in a Bruker D8 VENTURE diffractometer. Subsequent X-ray study was performed under an  $\text{N}_2$  cryo-stream at 150 K.

**Data Collection.** Preliminary cell constants were first determined using reflections harvested from a set of 180 frames. These sets of frames were positioned such that a half sphere coverage in the reciprocal space was surveyed to allow determination of initial orientation matrices from 1408 reflections. Next, data collection was performed using a Mo  $\text{K}\alpha$  radiation source (graphite monochromator) with frame time of 2.5 seconds and a detector distance of 4.9 cm. A randomly oriented region of reciprocal space was surveyed to achieve complete data with a redundancy of 6.3. Sections of frames were collected in  $0.5^\circ$  steps as  $\omega$  and  $\phi$  scans. During reduction, data to a resolution of  $0.81 \text{ \AA}$  were considered. Cell constants after data reduction were calculated from the xyz centroids of 8252 strong reflections after integration (SAINT).<sup>1</sup> Absorption correction was applied to the intensity data (SADABS).<sup>2</sup> For additional crystal and refinement information, refer to Table S1.

**Structure Solution and Refinement.** A space group of  $P2_1/c$  was determined based on intensity statistics and systematic absences. Superflip<sup>3</sup> was used to solve the structure which was then refined (full-matrix least-squares) using the Oxford University Crystals software package for Windows.<sup>4</sup> Non-hydrogen atoms were refined with anisotropic displacement parameters before placing hydrogen atoms in ideal geometric positions. Additional refinement cycles then performed

in which these hydrogen atoms were refined as riding atoms with individual relative isotropic displacement parameters. The final full-matrix least-squares refinement converged with  $R1 = 0.0674$  and  $wR2 = 0.1233$  ( $F^2$ , all data).

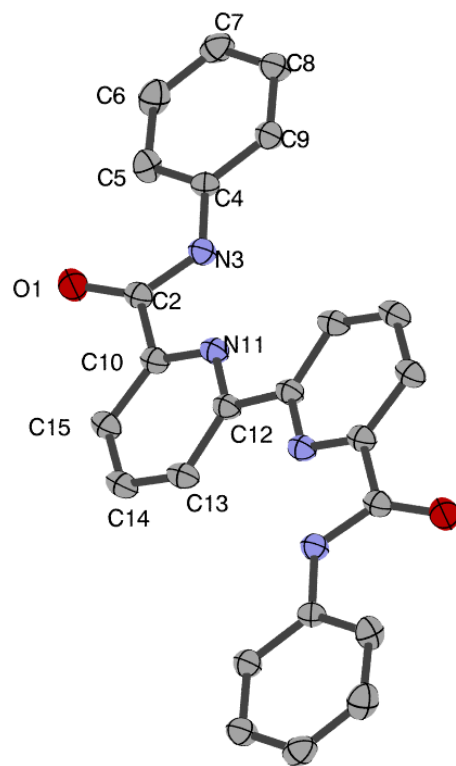

**Figure S17.** Crystal structure of H<sub>2</sub><sup>Ph</sup>bpy-da with atom labels on the asymmetric unit.

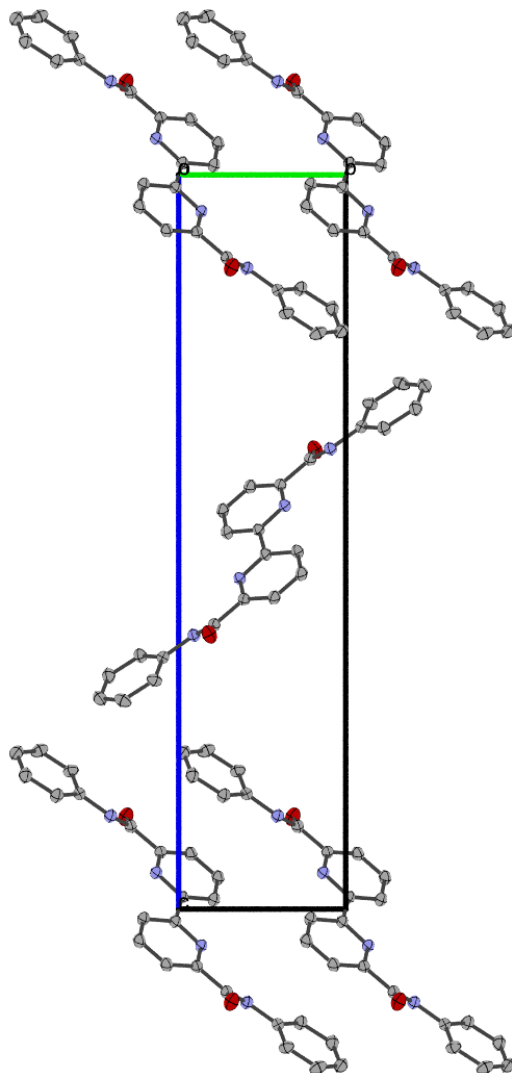

**Figure S18.** Cell plot of H<sub>2</sub><sup>Ph</sup>bpy-da, viewed along the a axis.

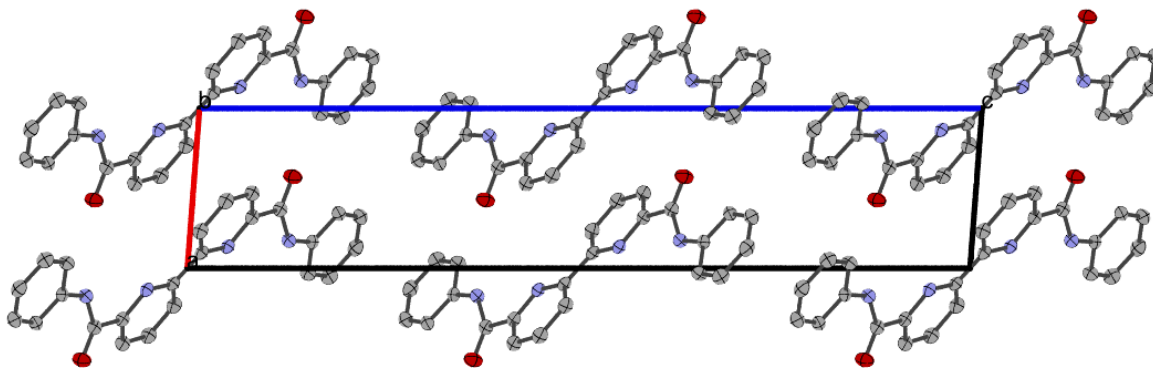

**Figure S19.** Cell plot of H<sub>2</sub><sup>Ph</sup>bpy-da, viewed along the b axis.

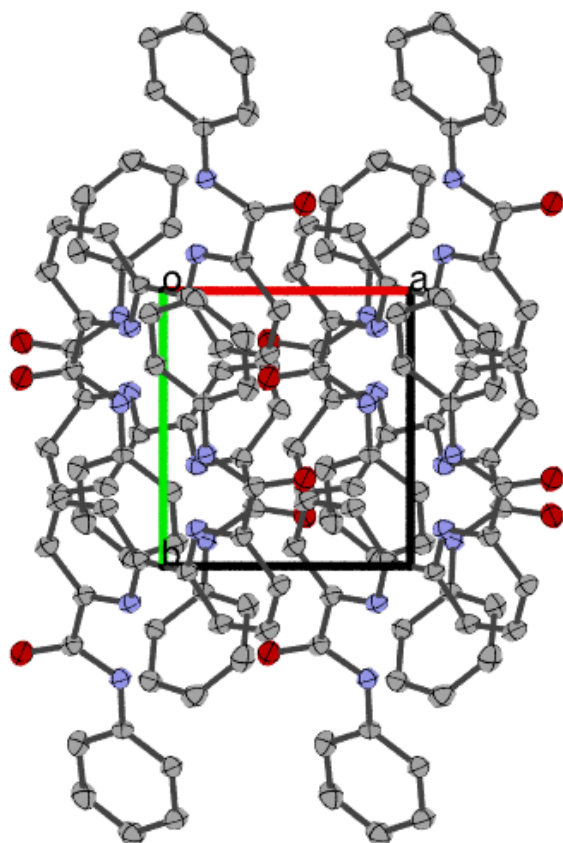

**Figure S20.** Cell plot of  $\text{H}_2^{\text{Ph}}\text{bpy-da}$ , viewed along the  $c$  axis.



**Table S1. Crystal data and structure refinement for 22021.**

|                                                       |                                                               |
|-------------------------------------------------------|---------------------------------------------------------------|
| Identification code                                   | 22021                                                         |
| Empirical formula                                     | C <sub>24</sub> H <sub>18</sub> N <sub>4</sub> O <sub>2</sub> |
| Formula weight / g/mol                                | 394.43                                                        |
| Temperature/K                                         | 150                                                           |
| Crystal system                                        | Monoclinic                                                    |
| Space group                                           | <i>P2<sub>1</sub>/c</i>                                       |
| <i>a</i> /Å                                           | 5.5694(3)                                                     |
| <i>b</i> /Å                                           | 6.1838(3)                                                     |
| <i>c</i> /Å                                           | 27.2625(10)                                                   |
| $\alpha$ /°                                           | 90                                                            |
| $\beta$ /°                                            | 94.3510(15)                                                   |
| $\gamma$ /°                                           | 90                                                            |
| Volume/Å <sup>3</sup>                                 | 938.92                                                        |
| <i>Z</i>                                              | 2                                                             |
| $\rho_{\text{calc}}$ / g/cm <sup>3</sup>              | 1.40                                                          |
| $\mu$ /mm <sup>-1</sup>                               | 0.92                                                          |
| F(000)                                                | 412.00                                                        |
| Crystal size/mm <sup>3</sup>                          | 0.1 x 0.1 x 0.05                                              |
| Radiation                                             | Mo K $\alpha$ ( $\lambda$ = 0.71073)                          |
| 2 $\Theta$ range for data collection/°                | 2.997 to 32.360                                               |
| Index ranges                                          | -8 ≤ <i>h</i> ≤ 7, -8 ≤ <i>k</i> ≤ 9, -40 ≤ <i>l</i> ≤ 35     |
| Reflections collected                                 | 25640                                                         |
| Independent reflections                               | 3107                                                          |
| Data/restraints/parameters                            | 3100 / 0 / 136                                                |
| Goodness-of-fit on F <sup>2</sup>                     | 0.997                                                         |
| Final R indexes [ <i>I</i> ≥ 2 $\sigma$ ( <i>I</i> )] | R <sub>1</sub> = 0.0466, wR <sub>2</sub> = 0.1137             |
| Final R indexes [all data]                            | R <sub>1</sub> = 0.0674, wR <sub>2</sub> = 0.1233             |
| Largest diff peak/hole/e Å <sup>-3</sup>              | -0.38 / 0.52                                                  |

**Table S2. Bond Lengths (Å) for 22021.**

| Atom | Atom | Length   |
|------|------|----------|
| O1   | C2   | 1.226(2) |
| C2   | N3   | 1.352(1) |
| C2   | C10  | 1.504(2) |
| N3   | C4   | 1.411(1) |
| C4   | C5   | 1.390(2) |
| C4   | C9   | 1.390(2) |
| C5   | C6   | 1.392(2) |
| C6   | C7   | 1.379(2) |
| C7   | C8   | 1.388(2) |
| C8   | C9   | 1.386(2) |
| C10  | N11  | 1.337(2) |
| C10  | C15  | 1.389(2) |

|     |     |          |
|-----|-----|----------|
| N11 | C12 | 1.344(1) |
| C12 | C13 | 1.400(2) |
| C12 | C12 | 1.482(2) |
| C13 | C14 | 1.381(2) |
| C14 | C15 | 1.385(2) |
| O1  | C2  | 1.226(2) |
| C2  | N3  | 1.352(1) |
| C2  | C10 | 1.504(2) |
| N3  | C4  | 1.411(1) |
| C4  | C5  | 1.390(2) |
| C4  | C9  | 1.390(2) |
| C5  | C6  | 1.392(2) |
| C6  | C7  | 1.379(2) |
| C7  | C8  | 1.388(2) |
| C8  | C9  | 1.386(2) |
| C10 | N11 | 1.337(2) |
| C10 | C15 | 1.389(2) |
| N11 | C12 | 1.344(1) |
| C12 | C13 | 1.400(2) |
| C13 | C14 | 1.381(2) |
| C14 | C15 | 1.385(2) |

**Table S3. Bond Angles (°) for 22021.**

| <b>Atom</b> | <b>Atom</b> | <b>Atom</b> | <b>Angle</b> |
|-------------|-------------|-------------|--------------|
| O1          | C2          | N3          | 125.6(1)     |
| O1          | C2          | C10         | 120.6(1)     |
| N3          | C2          | C10         | 113.88(9)    |
| C2          | N3          | C4          | 127.41(9)    |
| N3          | C4          | C5          | 122.9(1)     |
| N3          | C4          | C9          | 117.3(1)     |
| C5          | C4          | C9          | 119.8(1)     |
| C4          | C5          | C6          | 119.0(1)     |
| C5          | C6          | C7          | 121.4(1)     |
| C6          | C7          | C8          | 119.3(1)     |
| C7          | C8          | C9          | 120.1(1)     |
| C4          | C9          | C8          | 120.4(1)     |
| C2          | C10         | N11         | 117.4(1)     |
| C2          | C10         | C15         | 118.9(1)     |
| N11         | C10         | C15         | 123.7(1)     |
| C10         | N11         | C12         | 117.84(9)    |
| N11         | C12         | C13         | 122.1(1)     |
| N11         | C12         | C12         | 116.7(1)     |

|     |     |     |           |
|-----|-----|-----|-----------|
| C13 | C12 | C12 | 121.2(1)  |
| C12 | C13 | C14 | 118.9(1)  |
| C13 | C14 | C15 | 119.3(1)  |
| C10 | C15 | C14 | 118.1(1)  |
| O1  | C2  | N3  | 125.6(1)  |
| O1  | C2  | C10 | 120.6(1)  |
| N3  | C2  | C10 | 113.88(9) |
| C2  | N3  | C4  | 127.41(9) |
| N3  | C4  | C5  | 122.9(1)  |
| N3  | C4  | C9  | 117.3(1)  |
| C5  | C4  | C9  | 119.8(1)  |
| C4  | C5  | C6  | 119.0(1)  |
| C5  | C6  | C7  | 121.4(1)  |
| C6  | C7  | C8  | 119.3(1)  |
| C7  | C8  | C9  | 120.1(1)  |
| C4  | C9  | C8  | 120.4(1)  |
| C2  | C10 | N11 | 117.4(1)  |
| C2  | C10 | C15 | 118.9(1)  |
| N11 | C10 | C15 | 123.7(1)  |
| C10 | N11 | C12 | 117.84(9) |
| C12 | C12 | N11 | 116.7(1)  |
| C12 | C12 | C13 | 121.2(1)  |
| N11 | C12 | C13 | 122.1(1)  |
| C12 | C13 | C14 | 118.9(1)  |
| C13 | C14 | C15 | 119.3(1)  |
| C10 | C15 | C14 | 118.1(1)  |

## [1][PF<sub>6</sub>] – 21039

**Crystallographic Details.** The crystal sample was grown from a mixture of [1][BAr<sup>F</sup><sub>4</sub>], OPh<sub>3</sub>, and H<sub>2</sub><sup>Ph</sup>bpy-da dissolved in a saturated acetonitrile solution of ammonium hexafluorophosphate. From this sample, a red crystal of approximate dimensions 0.1 mm x 0.1 mm x 0.1 mm was placed onto the tip of a MiTeGen loop before mounting the crystal in a Bruker SMART Apex II diffractometer. Subsequent X-ray study was performed under an N<sub>2</sub> cryo-stream at 150 K.

**Crystallographic Details.** Preliminary cell constants were first determined using reflections harvested from 3 sets of 12 frames. These sets of frames were positioned so that orthogonal wedges of reciprocal space were surveyed to allow determination of initial orientation matrices from 128 reflections. Next, data collection was performed using a Cu K $\alpha$  radiation source (graphite monochromator), a theta-dependent frame window of 10-60 seconds, and a detector distance of 4 cm. A randomly oriented region of reciprocal space was surveyed to achieve complete data with a redundancy of 7.8. Sections of frames were collected in 1.0 ° steps as  $\omega$  and  $\phi$  scans. During reduction, data to a resolution of 0.82 Å were considered. Cell constants after data reduction were calculated from the xyz centroids of 8905 strong reflections after integration (SAINT).<sup>1</sup> Absorption correction was applied to the intensity data (SADABS).<sup>2</sup> For additional crystal and refinement information, refer to Table S4.

**Structure Solution and Refinement.** A space group of *P2<sub>1</sub>/c* was determined based on intensity statistics and systematic absences. Superflip<sup>3</sup> was used to solve the structure which was then refined (full-matrix least-squares) using the Oxford University Crystals software package for Windows.<sup>4</sup> Non-hydrogen atoms were refined with anisotropic displacement parameters before placing hydrogen atoms in ideal geometric positions. Additional refinement cycles then performed in which these hydrogen atoms were refined as riding atoms with individual relative isotropic

displacement parameters. The final full-matrix least-squares refinement converged with  $R1 = 0.0299$  and  $wR2 = 0.0386$  ( $F^2$ , all data).

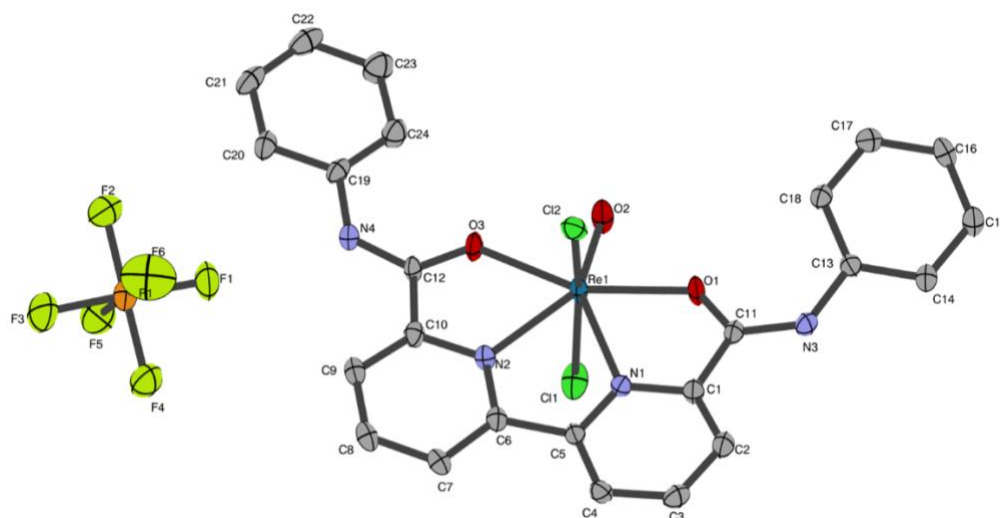

**Figure S21.** Crystal structure of  $[1][PF_6]$  with atom labels on the asymmetric unit.

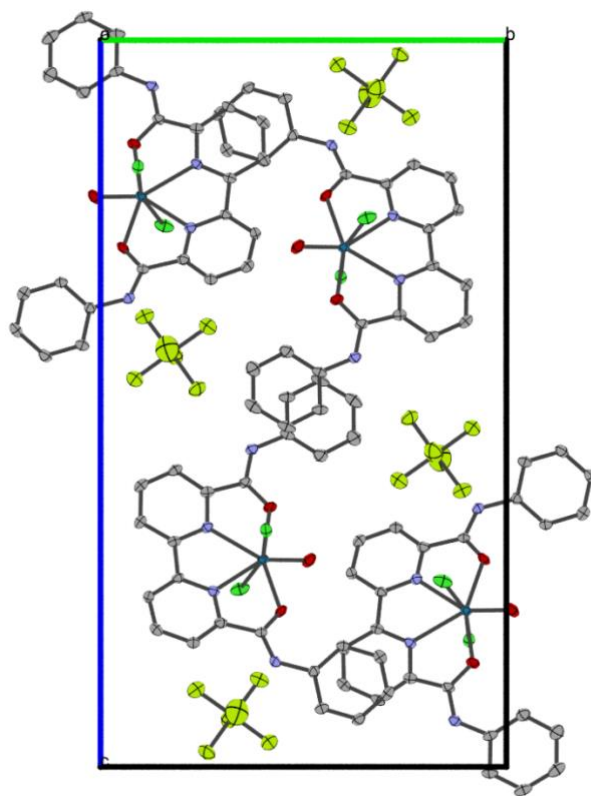

**Figure S22.** Cell plot of  $[1][PF_6]$ , viewed along a axis.

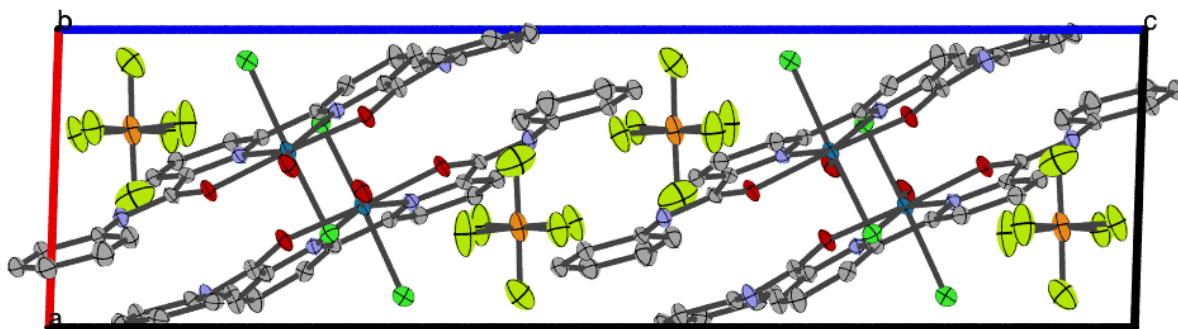

**Figure S23.** Cell plot of [1][PF<sub>6</sub>], viewed along b axis.

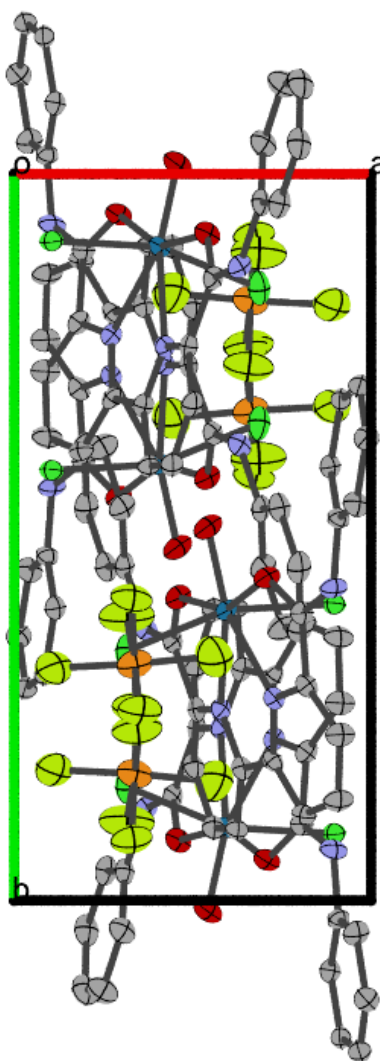

**Figure S24.** Cell plot of [1][PF<sub>6</sub>], viewed along c axis.

**Table S4. Crystal data and structure refinement for 21039.**

|                                                       |                                                                                                 |
|-------------------------------------------------------|-------------------------------------------------------------------------------------------------|
| Identification code                                   | 21039                                                                                           |
| Empirical formula                                     | ReCl <sub>2</sub> PF <sub>6</sub> O <sub>3</sub> N <sub>4</sub> C <sub>24</sub> H <sub>18</sub> |
| Formula weight                                        | 812.50                                                                                          |
| Temperature/K                                         | 150                                                                                             |
| Crystal system                                        | Monoclinic                                                                                      |
| Space group                                           | <i>P2<sub>1</sub>/c</i>                                                                         |
| <i>a</i> /Å                                           | 7.0838(2)                                                                                       |
| <i>b</i> /Å                                           | 14.3946(3)                                                                                      |
| <i>c</i> /Å                                           | 25.8235(6)                                                                                      |
| $\alpha$ /°                                           | 90                                                                                              |
| $\beta$ /°                                            | 91.8555(12)                                                                                     |
| $\gamma$ /°                                           | 90                                                                                              |
| Volume/Å <sup>3</sup>                                 | 2633.18(27)                                                                                     |
| Z                                                     | 4                                                                                               |
| $\rho_{\text{calc}}$ / g/cm <sup>3</sup>              | 2.050                                                                                           |
| $\mu$ /mm <sup>-1</sup>                               | 12.208                                                                                          |
| F(000)                                                | 1568                                                                                            |
| Crystal size/mm <sup>3</sup>                          | 0.1 x 0.1 x 0.1                                                                                 |
| Radiation                                             | Cu K $\alpha$ ( $\lambda$ = 1.54178)                                                            |
| 2 $\Theta$ range for data collection/°                | 3.425 to 72.395                                                                                 |
| Index ranges                                          | -8 ≤ <i>h</i> ≤ 8, -17 ≤ <i>k</i> ≤ 17, -30 ≤ <i>l</i> ≤ 31                                     |
| Reflections collected                                 | 22708                                                                                           |
| Independent reflections                               | 5193                                                                                            |
| Data/restraints/parameters                            | 5145 / 8 / 378                                                                                  |
| Goodness-of-fit on F <sup>2</sup>                     | 0.998                                                                                           |
| Final R indexes [ <i>I</i> ≥ 2 $\sigma$ ( <i>I</i> )] | R <sub>1</sub> = 0.0259, wR <sub>2</sub> = 0.0386                                               |
| Final R indexes [all data]                            | R <sub>1</sub> = 0.0299, wR <sub>2</sub> = 0.0386                                               |
| Largest diff. peak/hole / e Å <sup>-3</sup>           | -0.74 / 1.10                                                                                    |

**Table S5. Bond Lengths (Å) for 21039.**

| Atom | Atom | Length   |
|------|------|----------|
| C1   | C2   | 1.380(4) |
| C1   | C11  | 1.476(4) |
| C1   | N1   | 1.341(3) |
| C2   | C3   | 1.384(4) |
| C3   | C4   | 1.392(4) |
| C4   | C5   | 1.395(4) |
| C5   | C6   | 1.466(3) |
| C5   | N1   | 1.334(4) |
| C6   | C7   | 1.396(4) |
| C6   | N2   | 1.344(3) |

|     |     |           |
|-----|-----|-----------|
| C7  | C8  | 1.393(4)  |
| C8  | C9  | 1.384(4)  |
| C9  | C10 | 1.383(4)  |
| C10 | C12 | 1.470(4)  |
| C10 | N2  | 1.356(3)  |
| C11 | O1  | 1.255(3)  |
| C11 | N3  | 1.329(3)  |
| C12 | O3  | 1.248(3)  |
| C12 | N4  | 1.335(3)  |
| C13 | C14 | 1.393(4)  |
| C13 | C18 | 1.394(4)  |
| C13 | N3  | 1.426(4)  |
| C14 | C15 | 1.385(4)  |
| C15 | C16 | 1.386(4)  |
| C16 | C17 | 1.388(4)  |
| C17 | C18 | 1.398(4)  |
| C19 | C20 | 1.395(4)  |
| C19 | C24 | 1.380(4)  |
| C19 | N4  | 1.430(4)  |
| C20 | C21 | 1.385(4)  |
| C21 | C22 | 1.377(4)  |
| C22 | C23 | 1.388(4)  |
| C23 | C24 | 1.396(4)  |
| O1  | Re1 | 2.129(2)  |
| O2  | Re1 | 1.683(2)  |
| O3  | Re1 | 2.132(2)  |
| N1  | Re1 | 2.302(2)  |
| N2  | Re1 | 2.287(2)  |
| Cl1 | Re1 | 2.3479(7) |
| Cl2 | Re1 | 2.3564(6) |
| F1  | P1  | 1.598(2)  |
| F2  | P1  | 1.594(3)  |
| F3  | P1  | 1.602(2)  |
| F4  | P1  | 1.604(2)  |
| F5  | P1  | 1.611(2)  |
| F6  | P1  | 1.581(3)  |

**Table S6. Bond Angles (°) for 21039.**

| Atom | Atom | Atom | Angle    |
|------|------|------|----------|
| C2   | C1   | C11  | 126.7(2) |
| C2   | C1   | N1   | 123.1(2) |
| C11  | C1   | N1   | 110.2(2) |
| C1   | C2   | C3   | 118.3(3) |



|     |     |     |          |
|-----|-----|-----|----------|
| C2  | C3  | C4  | 119.0(3) |
| C3  | C4  | C5  | 119.0(2) |
| C4  | C5  | C6  | 124.0(2) |
| C4  | C5  | N1  | 121.6(2) |
| C6  | C5  | N1  | 114.3(2) |
| C5  | C6  | C7  | 124.2(2) |
| C5  | C6  | N2  | 113.3(2) |
| C7  | C6  | N2  | 122.5(2) |
| C6  | C7  | C8  | 118.4(2) |
| C7  | C8  | C9  | 119.3(2) |
| C8  | C9  | C10 | 118.9(2) |
| C9  | C10 | C12 | 127.5(2) |
| C9  | C10 | N2  | 122.6(2) |
| C12 | C10 | N2  | 109.8(2) |
| C1  | C11 | O1  | 116.4(2) |
| C1  | C11 | N3  | 121.1(2) |
| O1  | C11 | N3  | 122.6(2) |
| C10 | C12 | O3  | 116.6(2) |
| C10 | C12 | N4  | 120.5(2) |
| O3  | C12 | N4  | 122.9(2) |
| C14 | C13 | C18 | 120.7(2) |
| C14 | C13 | N3  | 116.6(2) |
| C18 | C13 | N3  | 122.6(2) |
| C13 | C14 | C15 | 119.6(3) |
| C14 | C15 | C16 | 120.3(3) |
| C15 | C16 | C17 | 120.2(3) |
| C16 | C17 | C18 | 120.1(2) |
| C13 | C18 | C17 | 119.1(2) |
| C20 | C19 | C24 | 121.1(3) |
| C20 | C19 | N4  | 115.1(2) |
| C24 | C19 | N4  | 123.8(2) |
| C19 | C20 | C21 | 119.0(3) |
| C20 | C21 | C22 | 120.7(3) |
| C21 | C22 | C23 | 120.0(3) |
| C22 | C23 | C24 | 120.2(3) |
| C19 | C24 | C23 | 119.0(3) |
| C11 | O1  | Re1 | 125.3(2) |
| C12 | O3  | Re1 | 125.5(2) |
| C1  | N1  | C5  | 118.9(2) |
| C1  | N1  | Re1 | 119.0(2) |
| C5  | N1  | Re1 | 122.1(2) |
| C6  | N2  | C10 | 118.2(2) |
| C6  | N2  | Re1 | 122.7(2) |
| C10 | N2  | Re1 | 119.1(2) |

|     |     |     |           |
|-----|-----|-----|-----------|
| C11 | N3  | C13 | 126.6(2)  |
| C12 | N4  | C19 | 127.7(2)  |
| O1  | Rel | O2  | 77.45(9)  |
| O1  | Rel | O3  | 155.35(8) |
| O1  | Rel | N1  | 68.57(8)  |
| O1  | Rel | N2  | 135.97(8) |
| O1  | Rel | C11 | 93.36(6)  |
| O1  | Rel | C12 | 90.11(6)  |
| O2  | Rel | O3  | 77.97(9)  |
| O2  | Rel | N1  | 146.01(9) |
| O2  | Rel | N2  | 146.56(9) |
| O2  | Rel | C11 | 98.97(7)  |
| O2  | Rel | C12 | 98.53(7)  |
| O3  | Rel | N1  | 136.01(8) |
| O3  | Rel | N2  | 68.59(8)  |
| O3  | Rel | C11 | 92.18(6)  |
| O3  | Rel | C12 | 91.78(6)  |
| N1  | Rel | N2  | 67.42(8)  |
| N1  | Rel | C11 | 82.85(6)  |
| N1  | Rel | C12 | 82.47(6)  |
| N2  | Rel | C11 | 82.64(6)  |
| N2  | Rel | C12 | 82.96(6)  |
| C11 | Rel | C12 | 162.50(2) |
| F1  | P1  | F2  | 90.0(1)   |
| F1  | P1  | F3  | 177.4(1)  |
| F1  | P1  | F4  | 89.4(1)   |
| F1  | P1  | F5  | 90.8(1)   |
| F1  | P1  | F6  | 92.0(1)   |
| F2  | P1  | F3  | 91.1(1)   |
| F2  | P1  | F4  | 178.9(1)  |
| F2  | P1  | F5  | 89.8(1)   |
| F2  | P1  | F6  | 91.3(2)   |
| F3  | P1  | F4  | 89.5(1)   |
| F3  | P1  | F5  | 86.8(1)   |
| F3  | P1  | F6  | 90.3(2)   |
| F4  | P1  | F5  | 89.4(1)   |
| F4  | P1  | F6  | 89.6(1)   |
| F5  | P1  | F6  | 177.0(2)  |

## [Na•a18c6][2] – 21064

**Crystallographic Details.** The crystal sample was grown via addition of excess aza-18-crown-6 to a suspension of [Na][2]. The resulting mixture was filtered, and X-ray quality crystals were obtained via vapor diffusion of Et<sub>2</sub>O into the filtrate at -30 °C. From this sample, an orange crystal of approximate dimensions 0.1 mm x 0.1 mm x 0.1 mm was placed onto the tip of a MiTeGen loop before mounting the crystal in a Bruker SMART Apex II diffractometer. Subsequent X-ray study was performed at room temperature.

**Structure Solution and Refinement.** A dark orange crystal of approximate dimensions 0.1 mm x 0.1 mm x 0.1 mm was placed onto the tip of a MiTeGen loop before mounting the crystal in a Bruker SMART Apex II diffractometer. Subsequent X-ray study was performed at room temperature. Preliminary cell constants were first determined using reflections harvested from 3 sets of 12 frames. These sets of frames were positioned so that orthogonal wedges of reciprocal space were surveyed to allow determination of initial orientation matrices from 137 reflections. Next, data collection was performed assuming a  $P2_1/c$  space group using a Cu K $\alpha$  radiation source (graphite monochromator), a theta-dependent frame window between 10-30 seconds, and a detector distance of 4 cm. Sections of frames were collected in 0.5° steps as  $\omega$  and  $\phi$  scans. During reduction, data to a resolution of 0.84 Å were considered. Cell constants after data reduction were calculated from the xyz centroids of 7221 strong reflections after integration (SAINT).<sup>1</sup> Absorption correction was applied to the intensity data (SADABS).<sup>2</sup> For additional crystal and refinement information, refer to Table S7.

**Structure Solution and Refinement.** A space group of  $P2_1/c$  was determined based on intensity statistics and systematic absences. SHELXT<sup>5</sup> was used to solve the structure which was then

refined (full-matrix least-squares) using the Oxford University Crystals software package for Windows.<sup>4</sup> Non-hydrogen atoms were refined with anisotropic displacement parameters before placing hydrogen atoms in ideal geometric positions. Additional refinement cycles then performed in which these hydrogen atoms were refined as riding atoms with individual relative isotropic displacement parameters. The final full-matrix least-squares refinement converged with R1 = 0.1059 and wR2 = 0.2546 (F<sup>2</sup>, all data).

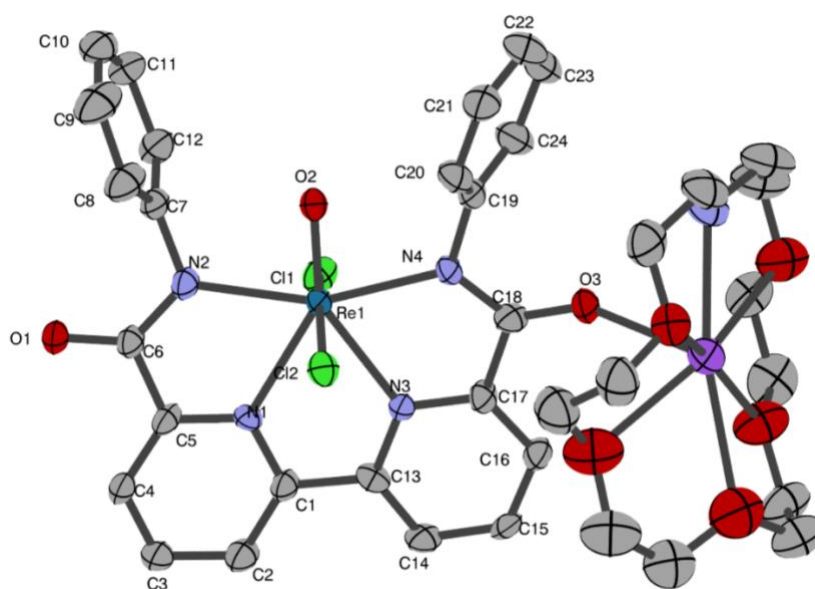

**Figure S25.** Crystal structure of [Na•a18c6][2] with atom labels on the [Re(Phbpy-da)(O)(Cl)<sub>2</sub>]<sup>-</sup> fragment of the asymmetric unit.

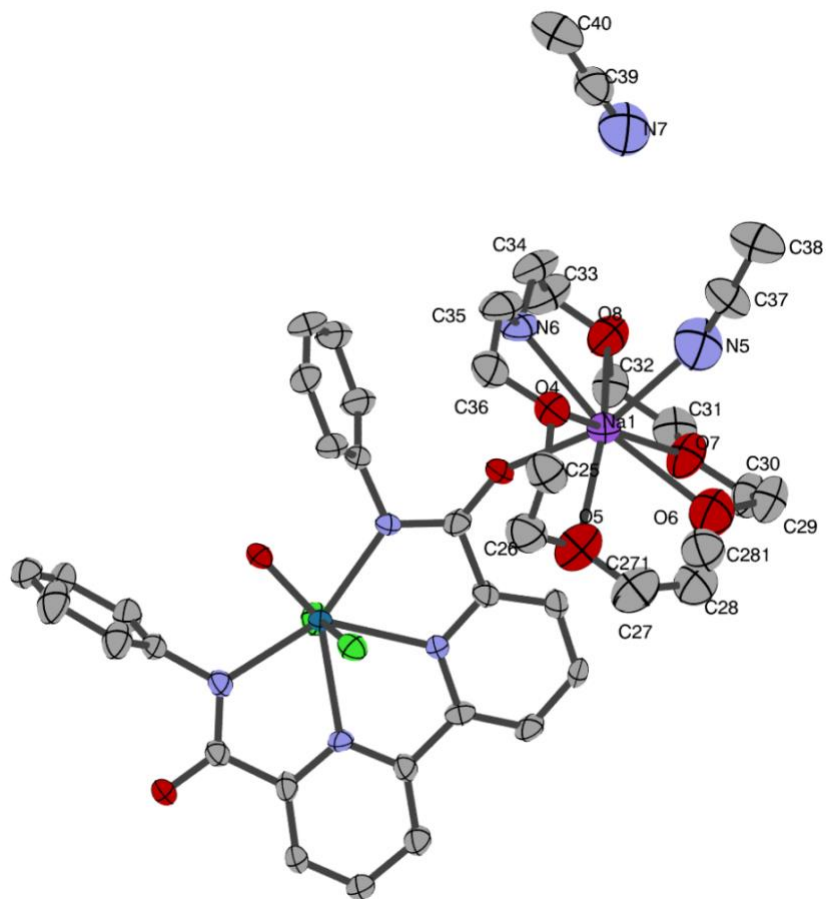

**Figure S26.** Crystal structure of  $[\text{Na}\cdot\text{a18c6}][\mathbf{2}]$  with atom labels on the  $[\text{Na}\cdot\text{a18c6}]^+$  fragment and additional acetonitrile molecules of the asymmetric unit.

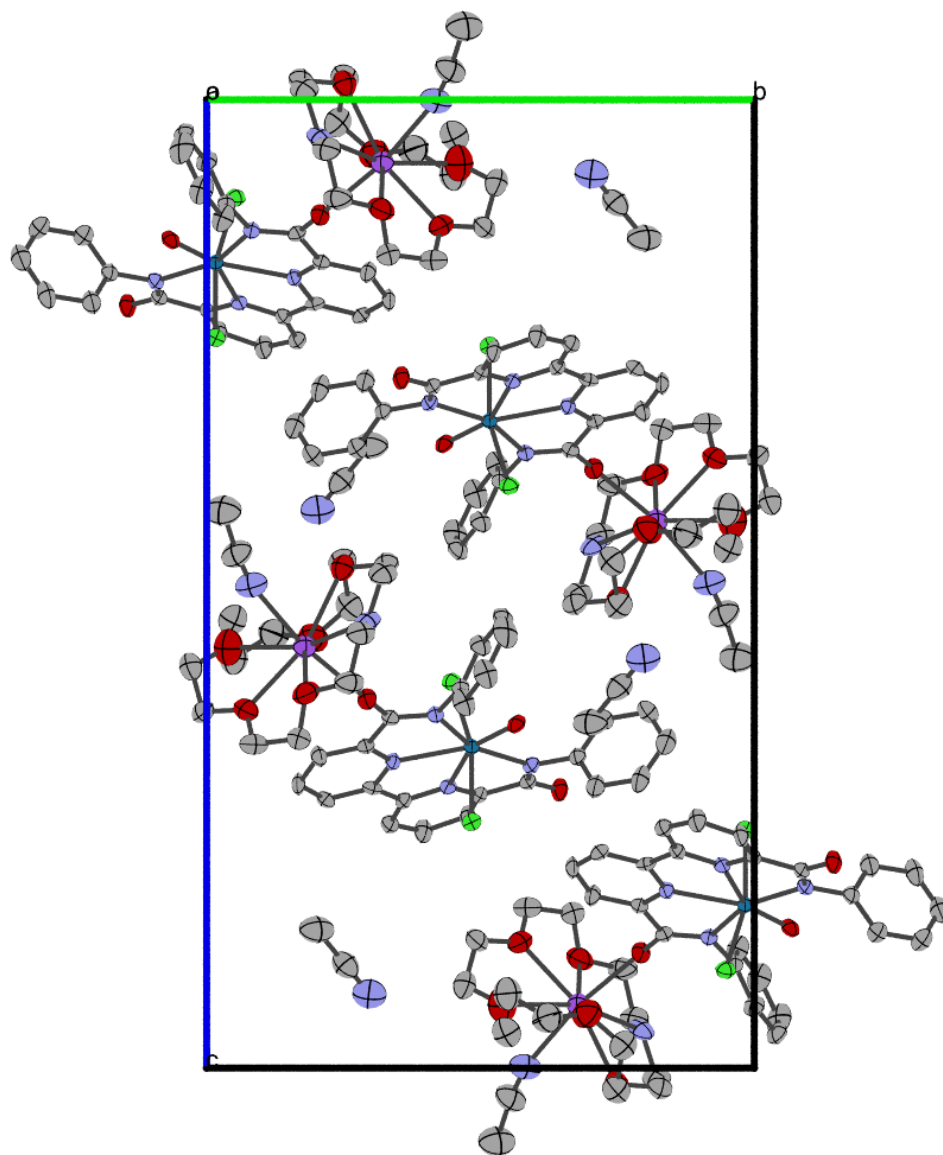

**Figure S27.** Cell plot of  $[\text{Na}\cdot\text{a18c6}][2]$ , viewed along a axis.

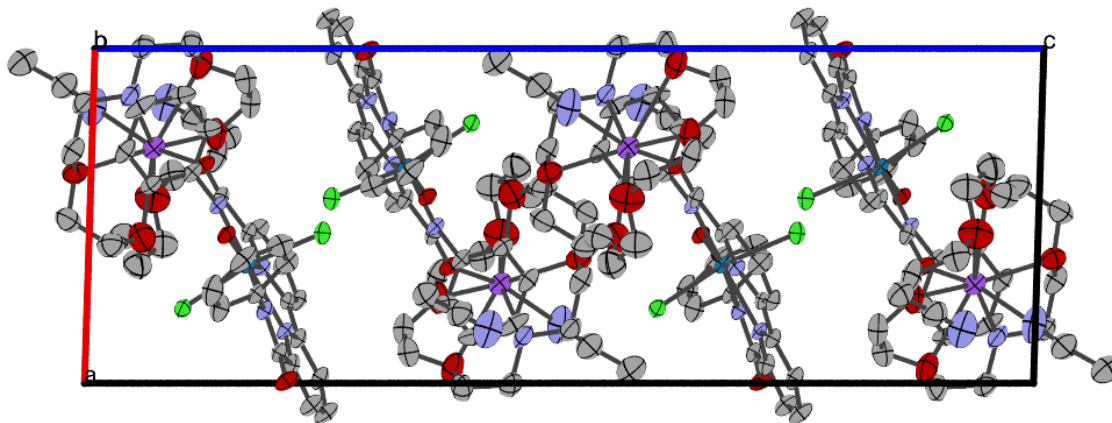

**Figure S28.** Cell plot of [Na•a18c6][2], viewed along b axis.

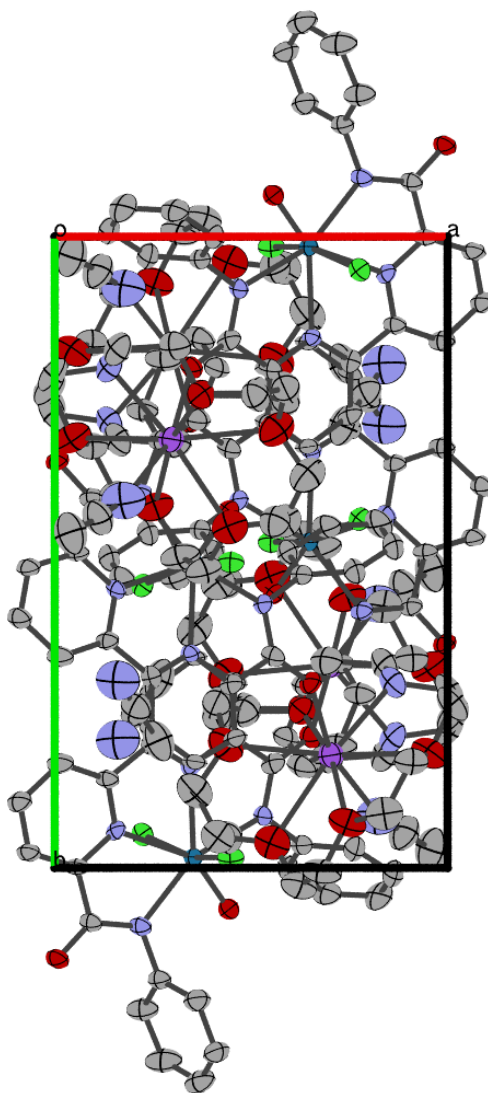

**Figure S29.** Cell plot of [Na•a18c6][2], viewed along c axis.

**Table S7. Crystal data and structure refinement for 21064.**

|                                                            |                                                                                             |
|------------------------------------------------------------|---------------------------------------------------------------------------------------------|
| Identification code                                        | 21064                                                                                       |
| Empirical formula                                          | ReCl <sub>2</sub> NaO <sub>8</sub> N <sub>7</sub> C <sub>40</sub> H <sub>46</sub>           |
| Formula weight                                             | 1033.95                                                                                     |
| Temperature/K                                              | 298                                                                                         |
| Crystal system                                             | Monoclinic                                                                                  |
| Space group                                                | <i>P2<sub>1</sub>/c</i>                                                                     |
| <i>a</i> /Å                                                | 9.821(2)                                                                                    |
| <i>b</i> /Å                                                | 15.764(4)                                                                                   |
| <i>c</i> /Å                                                | 27.909(6)                                                                                   |
| $\alpha$ /°                                                | 90                                                                                          |
| $\beta$ /°                                                 | 91.793(14)                                                                                  |
| $\gamma$ /°                                                | 90                                                                                          |
| Volume/Å <sup>3</sup>                                      | 4318.6(17)                                                                                  |
| <i>Z</i>                                                   | 4                                                                                           |
| $\rho_{\text{calc}} / \text{g/cm}^3$                       | 1.590                                                                                       |
| $\mu / \text{mm}^{-1}$                                     | 7.233                                                                                       |
| F(000)                                                     | 2080                                                                                        |
| Crystal size/mm <sup>3</sup>                               | 0.1 x 0.1 x 0.1                                                                             |
| Radiation                                                  | Cu K $\alpha$ ( $\lambda = 1.54178$ )                                                       |
| 2 $\Theta$ range for data collection/°                     | 3.168 to 71.670                                                                             |
| Index ranges                                               | -11 $\leq$ <i>h</i> $\leq$ 11, -18 $\leq$ <i>k</i> $\leq$ 18, -27 $\leq$ <i>l</i> $\leq$ 32 |
| Reflections collected                                      | 17769                                                                                       |
| Independent reflections                                    | 7716                                                                                        |
| Data/restraints/parameters                                 | 7682 / 254 / 555                                                                            |
| Goodness-of-fit on F <sup>2</sup>                          | 0.994                                                                                       |
| Final R indexes [ <i>I</i> $\geq$ 2 $\sigma$ ( <i>I</i> )] | R <sub>1</sub> = 0.0886, wR <sub>2</sub> = 0.1853                                           |
| Final R indexes [all data]                                 | R <sub>1</sub> = 0.0733, wR <sub>2</sub> = 0.1752                                           |
| Largest diff. peak/hole / e Å <sup>-3</sup>                | -3.39 / 4.79                                                                                |

**Table S8. Bond Lengths (Å) for 21064.**

| Atom | Atom | Length   |
|------|------|----------|
| Re1  | Cl1  | 2.386(2) |
| Re1  | Cl2  | 2.368(2) |
| Re1  | O2   | 1.687(6) |
| Re1  | N1   | 2.319(7) |
| Re1  | N2   | 2.229(7) |
| Re1  | N3   | 2.305(8) |
| Re1  | N4   | 2.212(7) |
| Na1  | O3   | 2.388(8) |
| Na1  | O4   | 2.661(9) |
| Na1  | O5   | 2.66(1)  |
| Na1  | O6   | 2.64(1)  |



|     |     |          |
|-----|-----|----------|
| Na1 | O7  | 2.512(9) |
| Na1 | O8  | 2.83(1)  |
| Na1 | N5  | 2.61(2)  |
| Na1 | N6  | 2.48(1)  |
| O1  | C6  | 1.25(1)  |
| O3  | C18 | 1.25(1)  |
| O4  | C25 | 1.401(9) |
| O4  | C36 | 1.40(1)  |
| O5  | C26 | 1.40(1)  |
| O5  | C27 | 1.39(1)  |
| O6  | C28 | 1.40(2)  |
| O6  | C29 | 1.40(1)  |
| O7  | C30 | 1.39(1)  |
| O7  | C31 | 1.40(1)  |
| O8  | C32 | 1.392(9) |
| O8  | C33 | 1.39(1)  |
| N1  | C1  | 1.36(1)  |
| N1  | C5  | 1.35(1)  |
| N2  | C6  | 1.32(1)  |
| N2  | C7  | 1.43(1)  |
| N3  | C13 | 1.36(1)  |
| N3  | C17 | 1.35(1)  |
| N4  | C18 | 1.33(1)  |
| N4  | C19 | 1.426(9) |
| N5  | C37 | 1.16(2)  |
| N6  | C34 | 1.47(2)  |
| N6  | C35 | 1.48(1)  |
| C1  | C2  | 1.39(1)  |
| C1  | C13 | 1.46(1)  |
| C2  | C3  | 1.41(1)  |
| C3  | C4  | 1.36(1)  |
| C4  | C5  | 1.38(1)  |
| C5  | C6  | 1.48(1)  |
| C7  | C8  | 1.39(1)  |
| C7  | C12 | 1.39(1)  |
| C8  | C9  | 1.40(1)  |
| C9  | C10 | 1.38(1)  |
| C10 | C11 | 1.37(1)  |
| C11 | C12 | 1.40(1)  |
| C13 | C14 | 1.38(1)  |
| C14 | C15 | 1.38(1)  |
| C15 | C16 | 1.40(1)  |
| C16 | C17 | 1.39(1)  |
| C17 | C18 | 1.49(1)  |

|     |     |          |
|-----|-----|----------|
| C19 | C20 | 1.39(1)  |
| C19 | C24 | 1.391(9) |
| C20 | C21 | 1.40(1)  |
| C21 | C22 | 1.38(1)  |
| C22 | C23 | 1.38(1)  |
| C23 | C24 | 1.40(1)  |
| C25 | C26 | 1.48(1)  |
| C27 | C28 | 1.47(2)  |
| C29 | C30 | 1.47(1)  |
| C31 | C32 | 1.47(1)  |
| C33 | C34 | 1.47(1)  |
| C35 | C36 | 1.48(1)  |
| C37 | C38 | 1.46(2)  |
| N7  | C39 | 1.16(2)  |
| C39 | C40 | 1.42(2)  |

**Table S9. Bond Angles (°) for 21064.**

| <b>Atom</b> | <b>Atom</b> | <b>Atom</b> | <b>Angle</b> |
|-------------|-------------|-------------|--------------|
| Cl1         | Re1         | Cl2         | 162.60(8)    |
| Cl1         | Re1         | O2          | 97.9(2)      |
| Cl1         | Re1         | N1          | 84.0(2)      |
| Cl1         | Re1         | N2          | 91.7(2)      |
| Cl1         | Re1         | N3          | 81.1(2)      |
| Cl1         | Re1         | N4          | 93.1(2)      |
| Cl2         | Re1         | O2          | 99.5(2)      |
| Cl2         | Re1         | N1          | 82.0(2)      |
| Cl2         | Re1         | N2          | 92.6(2)      |
| Cl2         | Re1         | N3          | 83.9(2)      |
| Cl2         | Re1         | N4          | 89.6(2)      |
| O2          | Re1         | N1          | 146.5(3)     |
| O2          | Re1         | N2          | 78.6(3)      |
| O2          | Re1         | N3          | 146.9(3)     |
| O2          | Re1         | N4          | 78.4(3)      |
| N1          | Re1         | N2          | 67.9(2)      |
| N1          | Re1         | N3          | 66.6(2)      |
| N1          | Re1         | N4          | 135.0(2)     |
| N2          | Re1         | N3          | 134.4(2)     |
| N2          | Re1         | N4          | 156.9(2)     |
| N3          | Re1         | N4          | 68.6(2)      |
| O3          | Na1         | O4          | 99.7(3)      |
| O3          | Na1         | O5          | 78.3(3)      |
| O3          | Na1         | O6          | 121.1(3)     |
| O3          | Na1         | O7          | 95.2(3)      |
| O3          | Na1         | O8          | 82.4(3)      |

|     |     |     |          |
|-----|-----|-----|----------|
| O3  | Na1 | N5  | 162.7(4) |
| O3  | Na1 | N6  | 75.7(3)  |
| O4  | Na1 | O5  | 65.0(3)  |
| O4  | Na1 | O6  | 100.3(3) |
| O4  | Na1 | O7  | 161.9(3) |
| O4  | Na1 | O8  | 131.4(3) |
| O4  | Na1 | N5  | 77.5(4)  |
| O4  | Na1 | N6  | 68.4(3)  |
| O5  | Na1 | O6  | 61.9(3)  |
| O5  | Na1 | O7  | 108.7(3) |
| O5  | Na1 | O8  | 157.0(3) |
| O5  | Na1 | N5  | 114.8(4) |
| O5  | Na1 | N6  | 120.8(3) |
| O6  | Na1 | O7  | 62.9(3)  |
| O6  | Na1 | O8  | 120.2(3) |
| O6  | Na1 | N5  | 76.0(4)  |
| O6  | Na1 | N6  | 161.9(4) |
| O7  | Na1 | O8  | 60.7(3)  |
| O7  | Na1 | N5  | 91.1(4)  |
| O7  | Na1 | N6  | 125.9(3) |
| O8  | Na1 | N5  | 86.8(4)  |
| O8  | Na1 | N6  | 65.2(3)  |
| N5  | Na1 | N6  | 87.6(4)  |
| Na1 | O3  | C18 | 144.3(6) |
| Na1 | O4  | C25 | 113.4(5) |
| Na1 | O4  | C36 | 106.8(5) |
| C25 | O4  | C36 | 116.3(7) |
| Na1 | O5  | C26 | 108.7(7) |
| Na1 | O5  | C27 | 119.0(8) |
| C26 | O5  | C27 | 117(1)   |
| Na1 | O6  | C28 | 116.6(8) |
| Na1 | O6  | C29 | 112.1(7) |
| C28 | O6  | C29 | 118(1)   |
| Na1 | O7  | C30 | 122.5(6) |
| Na1 | O7  | C31 | 122.2(6) |
| C30 | O7  | C31 | 115.3(8) |
| Na1 | O8  | C32 | 100.2(5) |
| Na1 | O8  | C33 | 106.1(6) |
| C32 | O8  | C33 | 116.9(8) |
| Re1 | N1  | C1  | 122.8(5) |
| Re1 | N1  | C5  | 118.8(6) |
| C1  | N1  | C5  | 118.3(7) |
| Re1 | N2  | C6  | 124.9(6) |
| Re1 | N2  | C7  | 118.8(5) |

|     |     |     |          |
|-----|-----|-----|----------|
| C6  | N2  | C7  | 116.2(7) |
| Re1 | N3  | C13 | 123.5(5) |
| Re1 | N3  | C17 | 119.2(5) |
| C13 | N3  | C17 | 117.1(7) |
| Re1 | N4  | C18 | 125.4(6) |
| Re1 | N4  | C19 | 120.1(5) |
| C18 | N4  | C19 | 114.5(7) |
| Na1 | N5  | C37 | 165(1)   |
| Na1 | N6  | C34 | 115.6(7) |
| Na1 | N6  | C35 | 112.8(6) |
| C34 | N6  | C35 | 114.4(9) |
| N1  | C1  | C2  | 122.5(8) |
| N1  | C1  | C13 | 113.4(7) |
| C2  | C1  | C13 | 124.2(8) |
| C1  | C2  | C3  | 118.0(9) |
| C2  | C3  | C4  | 119(1)   |
| C3  | C4  | C5  | 121.3(9) |
| N1  | C5  | C4  | 121.4(8) |
| N1  | C5  | C6  | 114.8(8) |
| C4  | C5  | C6  | 123.8(9) |
| O1  | C6  | N2  | 128.7(8) |
| O1  | C6  | C5  | 118.9(8) |
| N2  | C6  | C5  | 112.2(8) |
| N2  | C7  | C8  | 121.3(7) |
| N2  | C7  | C12 | 118.3(7) |
| C8  | C7  | C12 | 120.4(7) |
| C7  | C8  | C9  | 119.4(8) |
| C8  | C9  | C10 | 120.1(8) |
| C9  | C10 | C11 | 120.6(8) |
| C10 | C11 | C12 | 120.1(8) |
| C7  | C12 | C11 | 119.4(8) |
| N3  | C13 | C1  | 113.2(7) |
| N3  | C13 | C14 | 123.0(8) |
| C1  | C13 | C14 | 123.7(8) |
| C13 | C14 | C15 | 119.2(8) |
| C14 | C15 | C16 | 119.0(8) |
| C15 | C16 | C17 | 118.2(8) |
| N3  | C17 | C16 | 123.5(8) |
| N3  | C17 | C18 | 114.7(8) |
| C16 | C17 | C18 | 121.8(8) |
| O3  | C18 | N4  | 129.1(8) |
| O3  | C18 | C17 | 118.9(8) |
| N4  | C18 | C17 | 112.0(8) |
| N4  | C19 | C20 | 119.8(6) |

|     |     |     |          |
|-----|-----|-----|----------|
| N4  | C19 | C24 | 119.7(6) |
| C20 | C19 | C24 | 120.4(7) |
| C19 | C20 | C21 | 119.4(7) |
| C20 | C21 | C22 | 120.1(8) |
| C21 | C22 | C23 | 120.7(9) |
| C22 | C23 | C24 | 120.2(8) |
| C19 | C24 | C23 | 119.3(8) |
| O4  | C25 | C26 | 111.8(7) |
| O5  | C26 | C25 | 111.7(9) |
| O5  | C27 | C28 | 112(1)   |
| O6  | C28 | C27 | 112(1)   |
| O6  | C29 | C30 | 111.7(9) |
| O7  | C30 | C29 | 111.7(9) |
| O7  | C31 | C32 | 111.8(8) |
| O8  | C32 | C31 | 111.7(7) |
| O8  | C33 | C34 | 111.8(9) |
| N6  | C34 | C33 | 109.0(9) |
| N6  | C35 | C36 | 110.8(8) |
| O4  | C36 | C35 | 111.8(8) |
| N5  | C37 | C38 | 171(2)   |
| N7  | C39 | C40 | 179(2)   |

#### IV. Cambridge Crystallographic Database Centre Comparisons

**Table S10. Re≡O Bond Distances in Pentagonal Bipyramidal Re<sup>V</sup> Terminal Oxo Complexes.**

| Reference Code      | Re≡O Distance (Å)    |
|---------------------|----------------------|
| KUKROX <sup>6</sup> | 1.666                |
| LAFLIO <sup>7</sup> | 1.752                |
| SOSQOG <sup>8</sup> | 1.662                |
| SOSQUM <sup>8</sup> | 1.688                |
| SOTFIQ <sup>8</sup> | 1.690                |
| SOZGIX <sup>9</sup> | 1.693                |
| <b>Average (σ)</b>  | <b>1.692 (0.029)</b> |

**Table S11. Re–N(bpy) and Re≡O Bond Distances in Octahedral Re<sup>V</sup> Terminal Oxo Complexes.**

| Reference Code       | Re–N(bpy) Distance;<br><i>trans</i> to oxo (Å) | Re–N(bpy) Distance;<br><i>cis</i> to oxo (Å) | Re≡O<br>Distance (Å) |
|----------------------|------------------------------------------------|----------------------------------------------|----------------------|
| BAWSAU <sup>10</sup> | 2.257                                          | 2.139                                        | 1.689                |
| ILIBAG <sup>11</sup> | 2.233                                          | 2.197                                        | 1.701                |
| ILIBEK <sup>11</sup> | 2.256                                          | 2.191                                        | 1.691                |
| KATHOC <sup>12</sup> | 2.359                                          | 2.128                                        | 1.682                |
| QUBJEC <sup>13</sup> | 2.284                                          | 2.199                                        | 1.669                |
| QUBJOM <sup>13</sup> | 2.286                                          | 2.204                                        | 1.687                |
| QUBJUS <sup>13</sup> | 2.296                                          | 2.151                                        | 1.689                |
| VEQLAE <sup>14</sup> | 2.322                                          | 2.134                                        | 1.671                |
| VEQLEI <sup>14</sup> | 2.264                                          | 2.050                                        | 1.644                |
| VEQLIM <sup>14</sup> | 2.303                                          | 2.132                                        | 1.674                |
| XOLKIS <sup>15</sup> | 2.275                                          | 2.184                                        | 1.687                |
| YILWAS <sup>16</sup> | 2.266                                          | 2.201                                        | 1.701                |
| <b>Average (σ)</b>   | <b>2.282 (0.034)</b>                           | <b>2.159 (0.044)</b>                         | <b>1.682 (0.015)</b> |

## V. Computational Information

DFT calculations were done using Gaussian 16.<sup>17</sup> The geometries were optimized to minima or transition states in the gas phase using the M06L functional and the 6-311G(d,p) basis set on the main group elements.<sup>18,19</sup> Rhenium carried the SDD relativistic ECP and associated basis set augmented with an f polarization function from the Frenking basis set (exponent = 0.86).<sup>20,21</sup> This level was also used to calculate the harmonic vibrational frequencies and to obtain the correction terms to the standard state Gibbs free energies at 1 M and 298 K ( $G^0$ ).<sup>22</sup> Final energies were obtained by single point calculations on the gas phase geometries using the def2-TZVP basis set on the non-metals and the def2-QZVP basis set and associated ECP on rhenium,<sup>23</sup> in a polarizable continuum representing THF as solvent.<sup>24</sup>

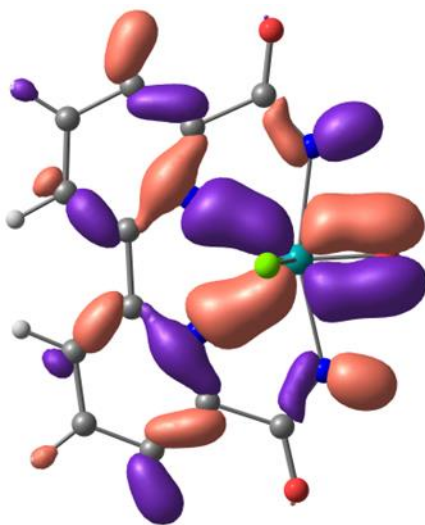

**Figure S30.** Canonical orbital rendering of MO corresponding to Re  $d_{xz}$  parent bonding orbital. MO simplified by replacement of N–Ph with N–H. MO rendered with isosurface value of  $0.3 \text{ e} \text{ \AA}^{-3}$ .

## VI. References

- 1 Bruker Analytical X-Ray Systems, .
- 2 R. H. Blessing, *Acta Crystallogr. Sect. A Found. Crystallogr.*, 1995, **51**, 33–38.
- 3 L. Palatinus and G. Chapuis, *J. Appl. Crystallogr.*, 2007, **40**, 786–790.
- 4 P. W. Betteridge, J. R. Carruthers, R. I. Cooper, K. Prout and D. J. Watkin, *J. Appl. Crystallogr.*, 2003, **36**, 1487–1487.
- 5 G. M. Sheldrick, *Acta Crystallogr. Sect. A Found. Crystallogr.*, 2015, **71**, 3–8.
- 6 C. M. Che, Y. P. Wang, K. S. Yeung, K. Y. Wong and S. M. Peng, *J. Chem. Soc. Dalt. Trans.*, 1992, **524**, 2675–2677.
- 7 H.-Y. Jin, S. Ikari, K. Kobayashi, K. Umakoshi, H. Sugimoto, A. Mitani, M. Abe, Y. Sasaki and T. Ito, *Bull. Chem. Soc. Jpn.*, 2004, **77**, 1139–1146.
- 8 L. Xu, I. A. Setyawati, J. Pierrero, M. Pink, V. G. Young, B. O. Patrick, S. J. Rettig and C. Orvig, *Inorg. Chem.*, 2000, **39**, 5958–5963.
- 9 M. Leeaphon, P. E. Fanwick and R. A. Walton, *Inorg. Chem.*, 1991, **30**, 4986–4995.
- 10 B. Machura, J. O. Dzięgielewski, R. Kruszynski, T. J. Bartczak and J. Kusz, *Polyhedron*, 2003, **22**, 2573–2580.
- 11 M. Papachristou, I. C. Pirmettis, C. Tsoukalas, D. Papagiannopoulou, C. Raptopoulou, A. Terzis, C. I. Stassinopoulou, E. Chiotellis, M. Pelecanou and M. Papadopoulos, *Inorg. Chem.*, 2003, **42**, 5778–5784.
- 12 W. A. Herrmann, J. G. Kuchler, G. Weischselbaumer, E. Herdtweck and P. Kiprof, *J. Organomet. Chem.*, 1989, **372**, 351–370.
- 13 J.-H. Jung, D. M. Hoffman and T. R. Lee, *J. Organomet. Chem.*, 2000, **599**, 112–122.
- 14 J. H. Jung, T. A. Albright, D. M. Hoffman and T. R. Lee, *J. Chem. Soc. - Dalt. Trans.*, 1999, **2**, 4487–4494.
- 15 J. H. Espenson, X. Shan, D. W. Lahti, T. M. Rockey, B. Saha and A. Ellern, *Inorg. Chem.*, 2001, **40**, 6717–6724.
- 16 D. Papagiannopoulou, I. Pirmettis, M. Pelecanou, D. Komiotis, M. Sagnou, D. Benaki, C. P. Raptopoulou, A. Terzis and M. S. Papadopoulos, *Inorganica Chim. Acta*, 2007, **360**, 3597–3602.
- 17 M. J. Frisch, 2016.
- 18 Y. Zhao and D. G. Truhlar, *J. Chem. Phys.*, 2006, **125**, 194101.
- 19 R. Krishnan, J. S. Binkley, R. Seeger and J. A. Pople, *J. Chem. Phys.*, 1980, **72**, 650–654.
- 20 D. Andrae, U. Häußermann, M. Dolg, H. Stoll and H. Preuß, *Theor. Chim. Acta*, 1990, **77**, 123–141.



- 21 A. W. Ehlers, M. Böhme, S. Dapprich, A. Gobbi, A. Höllwarth, V. Jonas, K. F. Köhler, R. Stegmann, A. Veldkamp and G. Frenking, *Chem. Phys. Lett.*, 1993, **208**, 111–114.
- 22 J. H. Jensen, *Phys. Chem. Chem. Phys.*, 2015, **17**, 12441–12451.
- 23 B. P. Pritchard, D. Altarawy, B. Didier, T. D. Gibson and T. L. Windus, *J. Chem. Inf. Model.*, 2019, **59**, 4814–4820.
- 24 A. V. Marenich, C. J. Cramer and D. G. Truhlar, *J. Phys. Chem. B*, 2009, **113**, 6378–6396.
